# Supplementary material for: A computational interactome and functional annotation for the human proteome
Source: eLife. 2016 Oct 22;5:e18715. doi: 10.7554/eLife.18715 (PMC5115866; doi:10.7554/eLife.18715)
Supplement: Figure 2—source data 1. — DOI: http://dx.doi.org/10.7554/eLife.18715.004 [file elife-18715-fig2-data1.xlsx]

## Sheet: Figure 1
Interacting proteins and PrePPI prediction LRs for interactions in datasets used in Figure 1B and 1C.
HC			PRS			RRS
PPI	LR		PPI	LR		PPI	LR
P39748|P12004	1.50797e+12		P39748|P12004	1.50797e+12		Q13616|Q96PM5	9691.47
P12004|P12004	3.86138e+11		P20618|Q99436	1.12166e+10		Q9NQC3|Q9GZV5	4713.61
P41235|P41235	3.62576e+11		P49736|P33993	6.04279e+09		Q96HU8|Q12829	2164.86
Q13404|P61088	3.53963e+11		Q9UKB1|P63208	3.5637e+09		O75582|O15264	1879.37
P68400|P67870	3.51138e+11		P28070|Q99436	2.54789e+09		P48547|Q9Y597	574.598
P49354|P49356	3.00773e+11		Q13133|P19793	1.90961e+09		Q9UBX3|Q9H1K4	540.432
P24941|P61024	2.54025e+11		P25787|P25789	1.36708e+09		O95427|Q08209	441.283
P27986|P42336	1.67168e+11		O43741|Q13131	1.05031e+09		Q9H0Y0|Q9UJX2	419.223
Q92905|Q9UBW8	1.06197e+11		P49720|Q99436	7.64099e+08		Q9NXW2|Q93079	336.124
P55072|Q92890	1.01516e+11		Q15797|Q13485	4.75675e+08		Q13618|Q86UP8	182.419
P55036|P54725	8.51625e+10		Q15078|Q00535	4.62407e+08		Q96DZ1|P55209	175.512
Q9UNZ2|P55072	8.51625e+10		P31749|O15530	2.92002e+08		P11802|P10073	165.951
Q13547|Q9P2R6	8.51625e+10		Q13042|P30260	2.3019e+08		O75531|P06748	158.96
Q15796|P84022	7.84035e+10		O14777|Q9BZD4	2.20229e+08		Q9NWZ3|O15460	158.487
Q9UNM6|P55036	7.53231e+10		P62993|P15498	2.18665e+08		O75477|P61619	154.782
P07900|P08238	7.53231e+10		P62993|P29353	2.10672e+08		Q86V24|P08648	145.631
P55072|P55072	7.53231e+10		P61769|P15813	2.0621e+08		Q08752|Q86XE0	137.346
Q15819|P61088	7.38958e+10		P61956|P63279	1.39663e+08		Q8IWP9|P49116	125.871
Q03135|O75955	7.38958e+10		Q9Y297|P63208	1.38933e+08		O15444|P22301	115.24
P23443|P42345	7.30248e+10		P52657|P20226	1.08457e+08		Q92506|Q9P2T1	113.218
Q8TAA3|P20618	7.24454e+10		P52435|P19387	9.7653e+07		P53680|Q96BJ8	110.601
P49368|P50990	7.24454e+10		P25963|P19838	7.97793e+07		Q6FI13|Q8IXL9	100.393
P60900|P20618	7.04906e+10		P63165|P63279	7.61677e+07		Q14511|P15880	100.284
Q14566|P33993	7.04906e+10		P24385|P24941	7.18586e+07		Q9H078|Q71RG4	96.4442
O14818|P20618	7.04906e+10		P19838|Q04206	6.12647e+07		P29590|Q8N427	91.8766
P14635|P06493	6.95313e+10		P62993|P27986	5.23874e+07		P54725|P36406	91.7853
Q9Y478|Q13131	6.95313e+10		P49736|P25205	4.59167e+07		P62993|Q99677	90.6539
P62191|Q13200	6.94696e+10		P25205|P33992	3.87054e+07		Q9NR90|Q9UFN0	83.632
P25788|P20618	6.94696e+10		P61769|P13747	3.3239e+07		O15247|P11473	71.204
P27694|P15927	6.86421e+10		Q9Y3B2|Q96B26	2.79039e+07		Q9Y3I1|P48506	71.013
P63279|P63279	6.77022e+10		Q9Y333|P62310	2.02347e+07		Q9UJW8|A8MXY4	65.3201
P27361|Q02750	6.77022e+10		O14777|Q9HBM1	1.66566e+07		Q9NQX1|Q01664	63.7788
Q9Y294|P62805	6.77022e+10		Q16665|P40337	1.51366e+07		P14550|Q9BZV1	62.839
P28482|Q02750	6.77022e+10		Q13362|P30153	1.31084e+07		Q8IYJ3|Q96HA7	59.1128
P31749|P31749	6.77022e+10		P19793|P11473	1.1561e+07		P42226|Q96Q45	58.7112
Q8TAT6|Q92890	6.52763e+10		P03372|Q15466	1.05705e+07		Q9UJY5|Q9UH92	55.6224
P17987|P48643	6.40369e+10		P46108|P62993	8.22097e+06		Q8NEM0|Q8N660	54.3157
Q00610|Q00610	6.40369e+10		O15392|Q53HL2	7.4212e+06		P62826|P67812	53.7368
P33992|Q14566	6.40369e+10		Q99717|Q13485	7.2598e+06		O94933|O14543	52.3031
P49736|Q14566	6.40369e+10		P03372|Q9Y6Q9	6.76563e+06		Q9BQ95|Q9UHB4	49.3667
P55036|P54727	6.40369e+10		P68431|P62805	6.30859e+06		Q9UHY1|Q9NRF2	47.6033
Q13415|O43913	6.40369e+10		P38398|Q92547	4.80073e+06		P39905|Q9H488	45.858
P33991|Q14566	6.40369e+10		P25963|P04637	4.72451e+06		Q9NQ89|Q86Y82	44.5573
Q9Y265|Q9Y230	6.34392e+10		Q13418|P48059	4.59673e+06		Q9NX08|Q9NRY5	44.5573
Q7L523|Q9HB90	6.34392e+10		Q03405|P00749	4.55775e+06		P08861|Q9H788	43.6081
P60880|Q16623	6.34392e+10		Q9GZQ8|Q13501	3.47314e+06		Q9Y5E4|Q13285	43.6027
Q06609|Q06609	6.29426e+10		Q15653|Q04206	3.44651e+06		P54274|Q8NCP5	43.39
P14635|P24941	5.84326e+10		Q8WU20|Q06124	2.68801e+06		Q15825|Q02246	43.2593
P53597|Q9P2R7	5.44261e+10		Q13616|Q13309	2.29185e+06		Q14004|Q5T5C0	42.7371
Q9ULM6|Q9UIV1	5.44261e+10		P60709|P07737	2.2888e+06		Q9NZZ3|O60293	41.558
P53621|P35606	5.44261e+10		P29274|P14416	2.25029e+06		Q8WTP8|Q15418	41.2974
P78536|P01375	5.28303e+10		P06241|O60880	2.07019e+06		O43150|O15195	39.1908
P01375|P01375	5.28303e+10		P24928|O00267	1.95562e+06		Q12866|P17706	39.021
P13010|P12956	4.64326e+10		Q00534|P42773	1.9316e+06		Q5JTJ3|Q15393	38.8877
P49721|P49720	4.10912e+10		Q15013|Q13257	1.91441e+06		P27797|P13995	33.0794
Q96LI5|Q9UIV1	3.56224e+10		Q05513|O15530	1.79948e+06		Q96MT8|P17181	31.8208
Q7L523|Q9NQL2	3.56224e+10		Q15399|O60603	1.54776e+06		Q8IXI1|Q15742	30.5227
Q13547|Q92769	2.27216e+10		O15116|Q9Y4Z0	1.45881e+06		Q9BXJ4|O15232	30.0146
P54619|Q13131	1.77358e+10		P07737|P50552	1.41415e+06		Q9UBL6|Q86UR1	29.8934
P31946|P62258	1.50486e+10		P03372|Q05086	1.38744e+06		A6NDU8|P68402	29.6527
P20248|P06493	1.48146e+10		P19878|P63000	1.32285e+06		Q15375|P84090	29.3754
Q9UBT2|P63165	1.41866e+10		O00161|Q13277	1.2183e+06		Q9NZN9|Q15036	29.1517
P31040|P21912	1.39259e+10		P55072|Q9BZV1	1.17661e+06		Q6ZN66|Q9UBH0	29.0622
P25786|P25788	1.33694e+10		Q9NPD3|Q15024	974328		Q8WXF8|P43250	28.0733
P25786|P25787	1.31697e+10		P24385|Q00534	966117		P14314|Q9NPH2	28.0357
Q09161|P52298	1.20095e+10		Q15843|P62877	905655		Q9H7C9|P49411	26.9043
Q8TAT6|P55072	1.1935e+10		P19878|P15153	890705		Q14728|P11277	26.7717
P25786|P25789	1.17595e+10		Q8WUM4|Q99816	756888		Q9BRP7|Q15750	26.698
Q16543|P08238	1.14855e+10		Q53EZ4|Q99816	732480		Q3T906|P28702	26.5813
P20618|Q99436	1.12166e+10		Q99759|Q13163	724846		Q7L1Q6|Q96IZ7	26.0617
P52701|P12004	1.10253e+10		P63279|P61086	698829		P07288|Q5SY16	25.2804
P62304|P62306	9.23932e+09		P29323|P12931	666139		Q9UBV7|Q04837	25.008
P47756|P47755	6.93404e+09		P19793|P10828	654442		P26232|Q9P121	24.8822
P20248|P24941	6.88582e+09		P04637|P63165	594844		O94772|P27986	24.5456
O95782|Q96CW1	6.8377e+09		Q15466|O00482	585732		Q96P09|Q96Q45	24.3815
Q86VP6|Q13616	6.78973e+09		P27348|Q13972	462768		Q96M34|Q8N323	23.1149
P49736|P33993	6.04279e+09		P08754|P41220	435916		O60861|Q96C36	22.3623
P33992|P33993	5.52212e+09		P38936|P12004	419081		Q9ULG6|Q92917	22.1474
Q9BVC4|P42345	5.42992e+09		P38398|Q14192	384128		Q9Y2E6|Q92993	21.8251
P25705|P36542	5.2872e+09		Q9Y6W6|P45983	352777		P28715|Q9NZ09	21.4708
P24385|P11802	5.10186e+09		P42574|O15519	321299		P01730|P50549	21.1334
P62191|P35998	4.24359e+09		P30307|P12004	316964		P23443|Q8NBM4	20.8349
O95782|P53680	3.97245e+09		Q12846|P63027	304433		Q14562|Q15771	20.8296
P62993|Q07889	3.78124e+09		P06748|P04637	299389		O75843|Q9HCH0	20.7514
P84022|Q13485	3.75983e+09		P24385|P03372	269703		P43353|Q6ZMR3	20.1183
P32322|Q96C36	3.65918e+09		P62826|Q9HAV4	257201		Q9H9P8|Q96C36	20.0125
Q9UKB1|P63208	3.5637e+09		Q96GD4|O15392	252467		Q8NCV1|Q9Y222	19.9489
P62306|P62316	3.31864e+09		Q8WV28|Q06187	240031		P63167|P19105	19.3436
P18858|P12004	3.27101e+09		Q9HC62|P55854	238013		P36639|P82930	19.0605
Q13618|P62877	3.24761e+09		Q15843|P61081	229023		Q15382|O75063	19.0605
P31323|P17612	3.20933e+09		Q9Y3I1|P63208	222410		Q9P1A6|Q9Y483	19.0505
O15144|P59998	3.18178e+09		Q96GD4|Q15691	203210		P36952|P10828	18.9553
P31323|P22694	3.18148e+09		P06241|P27986	189577		Q8N5Z5|Q9H9A6	18.8406
P25788|P25789	3.13059e+09		Q99836|O60603	185785		O00478|P20742	18.7554
P12004|P35249	3.10561e+09		Q12846|Q15836	178994		Q9NP61|O76021	18.4624
P28066|O14818	3.05947e+09		P60520|Q13501	174126		Q9BQP7|Q15046	18.4544
P25787|P28066	3.05947e+09		P11802|P42773	170153		Q9BQ04|Q6P9B6	18.2437
P0C0S5|P68431	2.97095e+09		P47897|P54136	158139		O60237|P46059	17.4372
P38606|P21281	2.59033e+09		Q9Y294|Q13112	155933		Q9UKJ8|Q6NUS8	16.5859
P49721|P28070	2.54789e+09		P63272|O00267	154876		Q9Y6X9|Q86TU7	16.5859
P28070|Q99436	2.54789e+09		P38398|Q9BX63	152555		Q96F63|P19367	16.2924
Q15796|Q13485	2.53413e+09		P62993|P29350	152424		Q5TBK1|Q9H7X0	16.2924
P25786|P28066	2.52661e+09		Q13480|Q06124	145354		Q9BUJ0|Q9BUA3	16.2924
P25788|P28074	2.43969e+09		Q92905|P09936	144602		Q9H5K3|Q8IYF3	15.8728
P20618|P49721	2.39881e+09		Q9UBU9|Q9UKK6	144088		Q86T13|O14796	15.7736
Q13616|P63208	2.32856e+09		P26842|Q12933	126348		Q7Z6J4|Q8WV99	15.6604
P20618|P49720	2.26488e+09		P30281|Q00534	125472		Q92832|Q9H106	15.4008
P49721|Q99436	2.26488e+09		Q92851|O15519	109565		P16219|Q9GZU5	15.3244
P25788|O14818	2.19745e+09		P50402|P02545	104367		Q96DT6|P20226	15.3018
P25787|P25788	2.19745e+09		P62993|O43561	102694		O60663|Q8TD91	15.2983
P12004|P35250	2.17986e+09		P24941|P38936	100474		O60888|P17022	15.1662
Q9Y490|P18206	2.16213e+09		Q13651|P22301	93004.6		Q9NV56|P62826	15.1291
O14744|Q9BQA1	2.04554e+09		Q14511|P84022	92044.9		Q9Y4F5|Q71U36	14.8359
P50213|O43837	2.04484e+09		P11532|Q9Y4J8	86919.8		Q8TF65|Q15198	14.7367
P49720|P28070	2.02236e+09		Q15466|P19793	78729.9		O00212|Q9HD33	14.6435
P25788|P28066	2.02236e+09		P62324|Q9UIV1	76278.8		P13765|O15296	14.5615
Q969H0|P63208	1.99891e+09		P62158|O43303	59984.2		Q5VZV1|O95199	14.2342
P24864|P24941	1.98176e+09		Q99963|Q96B97	55120		P43026|P62277	14.0695
P05023|P05026	1.92025e+09		P29590|P63165	53033.7		Q5T7M9|Q9UQ80	14.0488
Q13133|P19793	1.90961e+09		Q16849|Q13332	52567.2		O14842|P52739	13.9872
P40938|P35249	1.90417e+09		Q93034|Q15843	51772.2		Q9NVM6|Q6PEY2	13.8892
P63220|P08865	1.88693e+09		P31946|P08069	47384.6		Q96FJ2|Q08209	13.5692
P25705|P48047	1.87519e+09		P31946|P30304	46720.1		Q16790|P47869	13.4139
P25789|O14818	1.81454e+09		P02511|Q9UJY1	43029.4		Q96IY4|Q9NZC9	13.4139
Q9UJX2|P30260	1.77127e+09		Q8N2W9|P61956	41117.4		Q9H0R5|P34913	13.2534
P12004|P40937	1.74119e+09		Q8WV28|P16333	40174.1		Q16827|Q15437	13.0864
P25787|O14818	1.69234e+09		P08069|P29353	39812.7		P09210|Q99985	12.9899
P06756|P05106	1.63111e+09		Q92968|P40855	39090.6		O14639|Q9NYS7	12.9899
P62304|P62308	1.57937e+09		P19447|Q13889	38423.1		Q9H0E9|Q9BVS5	12.5635
P55072|Q04323	1.55709e+09		O14640|P84022	37598.6		Q5RIA9|Q6K0P9	12.3541
P20618|P28070	1.5379e+09		P03372|P12931	34638.8		Q9UI08|A8K8V0	12.3426
P48643|P49368	1.52414e+09		P20339|O00560	33592.1		Q8TE68|P80108	12.0447
P35221|P35222	1.43902e+09		P07992|P23025	32467.6		Q53H96|P55347	11.8694
Q14565|Q06609	1.39016e+09		P61024|Q13309	31806.5		Q9NW61|P04350	11.8638
P25787|P25789	1.36708e+09		P62805|Q16576	30697		Q53GQ0|Q03933	11.8072
O96020|P24941	1.30192e+09		P08069|P35568	29183.7		Q969Q4|Q9NVU0	11.7388
P25788|P60900	1.23422e+09		Q92844|Q12933	27676.9		P40394|Q15006	11.7388
P35250|P40937	1.16101e+09		Q05195|Q96ST3	25441.1		O60488|P23469	11.6779
P25788|Q99436	1.134e+09		P21860|P27986	25157.9		Q9Y294|Q9NSE4	11.477
P06576|P48047	1.12434e+09		O75676|Q16539	24667		Q8N6L1|Q86TP1	11.4489
Q9Y5K8|Q16864	1.08196e+09		Q9HD42|Q9UN37	24424.7		Q96MA1|Q9BRK0	11.4489
Q15436|O94855	1.06233e+09		P05067|O96018	23288.8		P04183|O95169	11.4489
P28066|P28070	1.05101e+09		Q13547|P29590	23244.9		Q9H257|Q9Y6I9	11.443
O43741|Q13131	1.05031e+09		Q99704|P07949	21415.3		P30711|P00995	11.3901
P47756|P52907	1.04262e+09		Q8N8S7|Q9UGI8	21377.2		P82675|Q9NQW1	11.352
Q9UNE7|P11142	1.02941e+09		P68431|P61964	21008.2		Q06547|Q6PEZ8	11.2133
P25789|P28066	1.00508e+09		P35609|P22460	19872.8		Q99996|Q13287	11.1617
Q92598|P11142	9.942e+08		Q16611|Q07820	19611.5		Q8NBU5|O95801	11.0083
P62191|P62195	9.90259e+08		O14777|O95229	19426.8		O60216|Q5VU13	10.9546
O94817|Q9H1Y0	9.77171e+08		P54274|Q9BSI4	18536.4		Q16526|Q8N108	10.9275
P35251|P35249	9.73343e+08		Q8WV28|Q96B97	18444.2		Q06203|P47985	10.8732
Q13547|O15379	9.56045e+08		Q9Y6X2|Q04206	18422		O43903|Q96LX8	10.8231
Q16543|P07900	9.49706e+08		Q15365|P26599	17080		Q03692|Q4G0N4	10.3962
P25788|P28072	9.44618e+08		O95257|P19793	16681.6		Q9NQS5|P23297	10.2252
P25788|P28070	9.44618e+08		P04637|P63279	16127.5		Q3KPI0|Q9NRY4	10.2004
P25789|P28070	9.37379e+08		P08069|O14543	15815.4		P08195|Q96B02	10.0898
P30153|P62714	9.31729e+08		P38398|P43246	15620.8		P36544|Q969X1	10.0413
Q14683|Q9UQE7	9.13739e+08		Q9Y239|O43353	14339		Q9Y6Z7|Q86YI8	10.0113
P13861|P17612	9.0688e+08		P20042|P16333	14026.9		Q12798|Q9BWT6	9.92477
P28482|P27361	8.98911e+08		O75436|Q9UBQ0	13165.6		Q12864|Q6ZMG9	9.89802
P25788|P49721	8.89564e+08		P08069|Q92569	12904.6		Q8WUY3|Q5T5C0	9.70503
P28066|P49721	8.68249e+08		P31946|Q9Y2J2	12488.2		P22748|Q7L2E3	9.46656
P25705|P06576	8.51696e+08		O60566|O43684	11777.5		Q9H019|O94844	9.42433
P25786|O14818	8.05851e+08		P31946|Q16890	11057		P49721|Q96B01	9.40242
P43686|P62195	7.96913e+08		Q9UER7|P63165	10781.7		Q92843|O95059	9.32563
P41743|Q9NPB6	7.95214e+08		P04637|O75925	10722.1		Q8WWZ3|Q96QH2	9.09973
O95067|P24941	7.85248e+08		P23443|Q9BY77	10692.3		P42677|Q8N2H4	9.08749
P28066|Q99436	7.82239e+08		P21860|Q14451	10621.9		Q8IUX8|Q96ST3	9.07171
Q15437|O94855	7.73501e+08		O75925|P63279	10594.4		P40313|Q15390	8.98697
P49720|Q99436	7.64099e+08		Q03135|P22307	10593.8		Q9UKM7|Q9UI38	8.94749
P55055|P48443	7.63986e+08		P14598|Q04206	10337		Q6P1R4|Q02833	8.94271
P41236|P62140	7.60056e+08		P04637|P53350	10173.9		P35414|O95147	8.7969
P25789|P49721	7.56399e+08		Q14192|Q9NYA1	10158.5		Q9Y2P8|Q96RE9	8.63201
O00487|P51665	7.51398e+08		P62136|Q12972	10124.6		O43422|Q6P9A1	8.59072
O95347|Q9NTJ3	7.37588e+08		Q9NR46|Q9Y371	9818.06		Q5T2N8|Q96CA5	8.52991
P22681|P62993	7.20916e+08		P43405|P27986	9326.85		P37023|Q9NPR2	8.48016
P10276|P19793	6.94156e+08		Q12802|P03372	8728.85		Q8N1Q8|Q9Y2V2	8.42035
P78371|P49368	6.88899e+08		P38398|Q16576	8652.83		Q15418|P78330	8.378
P04075|P09972	6.8269e+08		Q13191|Q96B97	8493.52		Q9BUH8|Q3B7J2	8.24698
P06576|P30049	6.80128e+08		Q9NPI6|Q8IU60	7924.7		Q8TD31|P19087	8.24698
P08237|P17858	6.74876e+08		Q5HYK7|Q96HL8	7910.7		Q5JWF2|Q9UNK4	8.23664
P49736|P33992	6.65194e+08		P49770|P16333	7490.75		Q9NSU2|Q96CK0	8.09322
P49736|P33991	6.63829e+08		P35269|Q00403	6893.51		Q96AQ7|Q969S8	8.01471
P13861|P22694	6.61443e+08		Q13315|Q9BXW9	6575.21		Q9Y4C8|Q495M9	7.99265
P62191|P17980	6.58191e+08		P19793|P20226	6225.48		Q8WZA2|Q9Y694	7.95684
P25789|P49720	6.56843e+08		P06748|P19338	6220.75		P14550|Q92609	7.86233
P61981|P63104	6.41268e+08		Q99836|P58753	5962.27		Q8N0T1|O14593	7.85231
P25786|P60900	6.36068e+08		O15117|O60880	5910.95		Q8N0T1|O95167	7.85231
P31321|P17612	6.2349e+08		Q99502|Q15475	5806.57		O43395|P0C1Z6	7.85231
P28066|P20618	6.20895e+08		P01374|P19438	5514.07		Q08426|Q9NV92	7.85231
P25789|P20618	6.20895e+08		P22736|P04637	5394.69		Q9NX63|O14832	7.85231
P25789|Q99436	6.20895e+08		P38919|P61326	5363.03		Q9Y2P8|Q15543	7.85231
P31946|P63104	6.17592e+08		O60880|Q13291	5334.18		Q6PF06|Q9UPT9	7.85231
P10644|P22694	6.10361e+08		Q9Y3B2|Q9NQT4	5043.95		Q8N9N2|Q9BRA0	7.83957
Q13617|P62877	5.96793e+08		Q15365|Q96PU8	5009.74		Q17R55|P15260	7.80985
P60900|O14818	5.96106e+08		P08069|Q06124	4928.07		Q9BUB4|Q96GC6	7.77069
P62310|P62312	5.79871e+08		Q9UER7|P14921	4806.9		Q02641|Q9H0E2	7.63227
P60900|P28074	5.71171e+08		P62873|P50150	4615.86		Q96GN5|Q96CS3	7.63227
P25787|P60900	5.62825e+08		P63167|Q15326	4128.15		O60880|O43615	7.59733
P17980|P25788	5.61732e+08		Q9UER7|P37173	3973.38		Q02246|Q14494	7.52593
P41236|P36873	5.44748e+08		Q9NPH3|Q9H0E2	3858.68		O15347|Q70EL1	7.52097
O94973|Q96CW1	5.41593e+08		P63010|Q5SW96	3691.67		Q53F39|Q9P0N9	7.49535
P62195|P25788	5.36111e+08		Q9UER7|P29590	3575.09		P06734|Q15415	7.48661
P25787|Q99436	5.35663e+08		P38398|Q6UWZ7	3549.84		O00626|Q96NE9	7.46769
P25787|P28070	5.33004e+08		Q16082|Q9UJY1	3540.52		P16389|Q9UMR3	7.43411
O43741|P54646	5.29819e+08		P48556|Q9Y5K5	3375.08		Q12866|Q96G30	7.35687
P03372|P06401	5.28108e+08		Q9UKG1|P20339	3048.49		Q8N8E3|Q8WTX7	7.35687
P25787|P20618	5.17073e+08		Q96CF2|Q8WUM4	3000.64		P07237|P58743	7.34683
P35998|P62195	5.09343e+08		P14416|P62166	2949.4		Q8N302|P80370	7.2049
P49137|Q16539	5.0439e+08		O95999|Q9H257	2680.39		P55957|Q9Y234	7.17793
P25789|P60900	5.02558e+08		P31751|Q9UKG1	2665.91		Q96KP4|Q29983	7.14548
P17987|P78371	5.01917e+08		Q674X7|O60437	2660.07		Q9H8H2|Q92871	7.10872
O15143|O15144	5.00823e+08		Q6IA86|P40763	2645.71		Q96PD2|Q03426	7.08734
P62333|P17980	4.9896e+08		Q14061|O43819	2633.84		P09326|Q9Y3L5	7.08491
P25098|P62873	4.93517e+08		P48059|O43639	2561.62		O43189|Q9GZM5	7.04226
Q99832|P50990	4.93179e+08		Q9Y2Y0|P36404	2474.73		O95825|Q96FV3	6.99931
P25787|P49721	4.86819e+08		P21860|O00459	1959.52		Q99445|P68431	6.97903
P33991|P33992	4.86161e+08		Q99933|P50502	1957.38		P07737|Q15916	6.92525
P25788|P49720	4.83834e+08		P50591|Q9UBN6	1904.08		O00476|Q86SE5	6.81591
P25788|P28062	4.81503e+08		Q07864|Q92547	1902.51		P33764|Q9HAV4	6.73738
P63151|P67775	4.79853e+08		P53365|P63000	1796.48		Q9NVP4|Q96BN6	6.6957
Q15797|Q13485	4.75675e+08		P15927|P40763	1688.58		Q13496|Q9ULD2	6.6957
P48643|P50990	4.72549e+08		P20336|Q9Y2J0	1584.2		P06850|Q9H255	6.6957
P50570|P62993	4.71047e+08		P49005|Q9HCU8	1535.83		Q9NX63|Q96EX3	6.6957
P02794|P02792	4.66074e+08		Q13418|Q6R327	1498.51		P58340|Q9Y3D3	6.6957
P13631|P19793	4.62771e+08		Q13287|P51692	1496.52		Q96FT7|Q86UU1	6.6957
Q15078|Q00535	4.62407e+08		Q9Y244|Q99436	1411.11		P15090|O75830	6.67856
P62877|P51668	4.58401e+08		P62805|Q9Y468	1377.04		Q8N884|Q9NQL2	6.59365
P17987|P49368	4.53752e+08		P16871|P13232	1364.37		Q8TAC1|Q96MT1	6.59026
Q9UNE7|P08238	4.53121e+08		P31749|Q15047	1271.42		P62081|P04004	6.5636
P25787|P49720	4.49794e+08		Q03135|P48995	1266.31		P35626|Q86VH5	6.36104
P28066|P49720	4.4936e+08		Q14155|O60880	1223.84		P30039|O94979	6.36037
P63010|Q96CW1	4.41107e+08		P32239|Q06124	1208.78		Q96CN7|O95789	6.36037
P60228|Q7L2H7	4.39806e+08		P23560|Q16620	1192.82		Q9NWV8|Q8WV99	6.30289
P41236|P62136	4.30564e+08		O60869|P37231	1162.34		Q9Y6K0|Q92871	6.2327
Q99741|P24941	4.21687e+08		Q13485|P63279	1125.61		Q6P161|P48643	6.2327
Q92793|Q09472	4.17998e+08		Q66K89|P04637	1120.55		Q8N690|Q86UU9	6.2327
P60900|Q99436	4.11007e+08		Q9Y244|P49720	1120.06		O75964|Q8IVH4	6.2327
P62258|P61981	4.08895e+08		Q00597|O15287	1114.9		Q16555|Q9Y4E5	6.18295
O14818|Q99436	4.02273e+08		Q16186|Q9Y5K5	1102.93		Q6TDP4|Q13426	6.17671
Q9BPX5|P59998	4.02244e+08		O60238|Q12983	1054.58		Q9NUQ8|Q9UKG9	6.16791
P78371|P48643	3.98392e+08		Q14155|Q13153	1048.22		Q5FVE4|Q5VW32	6.12971
P78371|Q99832	3.98392e+08		P56545|P57682	1028.53		Q9H8M1|O15320	6.11117
O15116|Q9Y333	3.96e+08		Q9Y5Y5|P40855	1009.82		P16452|Q9NR31	6.02495
P60900|P28070	3.94365e+08		Q00597|P42224	964.717		Q86UP8|Q9BUL9	6.01019
P35251|P35250	3.90779e+08		Q9UBT2|P63279	885.774		Q92915|P68431	5.87635
P12814|O43707	3.90593e+08		Q13547|Q15466	878.605		P02545|P05166	5.85028
P17980|P43686	3.86904e+08		Q9Y2I7|Q7Z6M1	817.127		Q9NVH1|P07902	5.83246
Q99942|Q969T4	3.84463e+08		P31947|P04150	811.351		O60684|Q13156	5.8318
O14818|P49721	3.77766e+08		P04637|Q96KB5	797.303		P01344|Q9Y4E6	5.8318
P17980|P35998	3.77059e+08		P04637|Q8WTS6	791.19		Q96PP8|Q8WV60	5.74543
P43686|P25788	3.71315e+08		Q96PU8|Q93062	715.785		Q9Y6W6|Q9NW61	5.70924
P62191|P25788	3.71315e+08		P38398|Q99759	649.807		Q01814|Q9H6R0	5.6981
Q16623|P61764	3.67912e+08		P40855|O96011	612.73		Q8WTS1|Q9NVV0	5.6875
P24864|P06493	3.65745e+08		Q9UNL4|Q04206	598.971		Q9UGQ3|P54315	5.67899
P61158|O15145	3.63231e+08		P07384|P49810	582.856		Q9BUU2|Q9UKJ0	5.63179
P29803|P11177	3.50391e+08		P55345|P03372	538.156		Q9Y5I2|Q6ZWI9	5.61226
O15270|O15269	3.39251e+08		P35080|P50552	530.826		Q96CS2|Q9Y3A6	5.57883
O60563|P50750	3.33243e+08		Q9UBU7|Q9Y5N6	521.197		Q8IWF9|Q9BXA6	5.57883
P48643|Q99832	3.30024e+08		P24522|P19793	512.241		Q8N0S6|Q969M1	5.57883
P17987|P50991	3.30024e+08		P07948|O75807	510.18		P55199|Q9Y6G3	5.57883
P35998|P25788	3.26041e+08		Q9UER7|P04150	506.73		P25685|Q9BRP4	5.5379
P51946|P50613	3.25534e+08		Q08117|Q04206	455.713		Q8WWZ1|Q9NY99	5.53479
P40937|P35249	3.20195e+08		Q99996|P62158	416.816		Q53T59|O75582	5.50646
P60900|P49721	3.07593e+08		P19878|P30041	401.11		Q5QGZ9|P22307	5.49734
P17980|P28066	3.07411e+08		O00161|O75558	400.992		P17181|Q9C026	5.47774
P62140|P36873	3.03632e+08		P78537|Q9UL45	386.07		P05549|Q7Z7F0	5.44237
Q9NPD3|Q9NQT4	3.02255e+08		Q9Y6K9|P21580	383.052		A0PJZ0|Q8N4F7	5.41298
P20336|Q9UNE2	2.99994e+08		P38398|Q9GZX5	366.069		Q9NXR5|P49796	5.39437
Q13232|P22392	2.97e+08		Q6GTX8|P29350	364.337		P62805|Q14112	5.24575
P17612|P22694	2.96897e+08		P84085|P53365	343.8		Q5TD97|P39019	5.21191
P14625|P11021	2.95216e+08		P04271|P23297	321.488		Q8WVZ7|Q96A61	5.21191
Q9Y4Z0|Q9UK45	2.94829e+08		Q13002|O00560	317.011		P27338|P62136	5.2069
P31749|O15530	2.92002e+08		Q9Y6K1|P63279	314.765		P36383|Q92748	5.20236
P17987|Q99832	2.90361e+08		P63165|P19438	308.618		O94889|P23381	5.19405
O14818|P28070	2.89992e+08		P51843|P36956	293.679		Q9NP61|P62316	5.13703
P49770|Q9UI10	2.86782e+08		P41212|P63279	244.643		P54793|Q9H6F2	5.0922
Q96CW1|P53680	2.84012e+08		Q15365|Q9Y2W2	238.311		P48740|A2A2V5	5.0922
P24863|P49336	2.80683e+08		Q9UHX1|Q9UHR5	228.421		Q96HE7|P23919	5.04849
P11908|P60891	2.80351e+08		P19438|P63279	227.111		P99999|Q96I15	5.04849
P35250|P35249	2.79473e+08		Q01081|O95218	217.552		O60220|Q9NRW7	5.04849
Q9NVP2|P68431	2.79224e+08		Q15078|P46527	212.403		Q6UX41|Q8TCX5	5.0262
P03372|Q92731	2.73373e+08		Q969H4|O00212	207.862		Q8TDG2|O60308	4.98464
Q06830|P32119	2.72673e+08		O95400|P83876	205.113		P50416|Q86X40	4.93027
P49841|P17612	2.6783e+08		Q12802|P21980	200.203		Q719I0|Q8N3T1	4.85904
O14965|P53350	2.66203e+08		P16157|Q5VST9	196.568		Q9P0P0|P49765	4.78854
O14818|P49720	2.64781e+08		P50552|Q15942	192.197		Q9Y3Q7|Q9NUX5	4.72887
P78371|P50991	2.63344e+08		Q15653|P19793	190.083		Q9HAZ1|Q13875	4.72385
P52566|P61586	2.60293e+08		P35240|Q96HU1	184.096		Q9Y6X9|Q6NTF9	4.68723
Q14289|P12931	2.59994e+08		P15336|P84022	176.266		Q99941|P10145	4.65763
Q9Y4P1|Q9H492	2.59641e+08		P68431|Q9Y468	173.674		P24534|Q8WUB2	4.65734
Q9Y478|P54646	2.5817e+08		Q9HD26|P17081	171.97		P02749|Q6NTF9	4.64022
Q13362|P67775	2.54748e+08		O95251|P49736	171.31		Q8N1Q8|O95340	4.62893
P49368|P40227	2.54415e+08		Q66K89|Q9NS23	169.842		Q8NFJ9|P12532	4.61196
P28066|P60900	2.49656e+08		P27986|P30874	164.19		P16442|Q9BTF0	4.59095
Q01082|Q13813	2.49139e+08		Q13158|O95243	158.84		Q16445|P37108	4.56628
O60216|Q9UQE7	2.45453e+08		Q96KR7|P62136	153.175		Q96M60|P29074	4.42814
P43686|O00231	2.44005e+08		O95400|Q9Y2W2	152.233		Q96M11|Q9Y244	4.42814
P60900|P49720	2.43864e+08		P63010|O60566	138.041		Q9NUQ8|O15342	4.42814
P49368|Q99832	2.43739e+08		P25963|Q6EEV6	133.822		Q96JY0|Q8NE18	4.4249
Q04917|P63104	2.41755e+08		P02753|P02766	112.351		Q3SYB3|Q9BSM1	4.38822
P62258|P63104	2.41755e+08		O14613|P51955	112.341		P00995|Q401N2	4.3857
Q13042|Q9UJX2	2.41682e+08		P10412|Q9Y468	106.675		Q8NE79|Q96MU7	4.37322
P61586|Q13464	2.37147e+08		P05067|Q99714	104.465		P16278|P60842	4.36922
Q13042|P30260	2.3019e+08		P38398|P17275	101.818		P39900|Q6P3X3	4.33458
Q9Y4Y9|Q9UK45	2.28821e+08		Q8N2W9|Q13485	101.243		Q9Y2Y0|P48728	4.262
P24941|P33552	2.23401e+08		Q13526|P10636	97.4193		Q9UPR0|Q96BY9	4.2428
O14777|Q9BZD4	2.20229e+08		P16220|Q6SA08	95.5715		P58417|Q8TCU3	4.2428
P62993|P15498	2.18665e+08		P51948|P33993	90.4725		Q86X95|Q9Y680	4.2428
P43686|P28066	2.17877e+08		P35637|Q12906	90.205		Q7Z628|Q7Z5S9	4.2428
P62195|O00231	2.17877e+08		O95251|P53350	89.4966		O60888|Q96G27	4.2428
Q13232|P15531	2.17815e+08		Q9NSV4|Q9NZQ3	89.4956		Q99708|Q86SQ9	4.2428
P62993|Q06124	2.16485e+08		P28070|Q15797	89.4276		Q8N5I2|P05114	4.2428
P33991|P33993	2.16283e+08		P78368|P16333	87.4691		Q8WY91|Q96HV5	4.2428
P62993|P52735	2.13105e+08		Q15796|Q13573	86.9473		P58173|Q9Y577	4.14683
O43617|Q9Y296	2.12981e+08		O14576|Q14203	85.2055		P27918|Q9H3T2	4.12468
Q16531|Q13216	2.12225e+08		P51959|Q15257	83.2145		P10746|Q9NYD6	4.11495
P62993|P29353	2.10672e+08		P31785|P13232	82.2028		Q8N0X4|Q9Y2C4	4.10788
P06239|P43403	2.08899e+08		P31749|P12268	75.005		Q86V35|Q9BQB6	4.09815
P43686|P35998	2.08855e+08		Q7L2E3|Q9Y5X4	72.9914		Q9H706|Q86VF2	4.05674
O15143|P59998	2.08418e+08		P17096|Q9Y5N6	67.8815		O43292|Q9BWT6	4.04516
Q9P2I0|Q9UKF6	2.07068e+08		Q5VU43|Q08499	67.7054		Q99439|P28358	4.00946
P61769|P15813	2.0621e+08		Q14451|Q92730	60.484		Q00325|O75127	3.98049
P55884|O75821	2.05127e+08		O14796|Q13291	59.9208		P61163|Q96F44	3.94926
Q00987|P04637	2.0396e+08		P16389|P61586	58.8298		Q8N386|P55000	3.90538
P41743|Q9BYG5	2.03725e+08		P18846|P38398	56.6934		O75344|Q8N307	3.9008
P50991|P49368	1.97619e+08		O75175|Q9UFF9	56.3472		O95990|Q14206	3.9008
P20226|P52655	1.97518e+08		P46527|Q9UKX7	55.8019		Q14195|Q9NWR8	3.9008
P38606|P15313	1.97398e+08		Q12852|Q9NS73	52.3841		Q53HC0|Q13363	3.9008
P04908|P68431	1.96697e+08		O60828|Q9Y2W2	52.0449		Q86Y37|Q6PJG9	3.89806
Q16514|P20226	1.95276e+08		P15531|P54274	49.6376		Q16878|Q9NV92	3.8724
P19388|P62487	1.94867e+08		P30281|Q9UBQ5	49.2428		Q9P032|Q86T96	3.8724
P25786|Q8TAA3	1.94343e+08		Q13241|P26715	48.1311		Q9NXD2|P28070	3.85682
P60953|P62834	1.93265e+08		O95257|P12004	47.3021		O75150|Q3SX64	3.82163
P28070|P28072	1.88811e+08		Q13573|Q06330	47.285		Q16665|A6NKB5	3.82163
Q10713|O75439	1.85178e+08		Q8TAE8|O75293	44.3662		Q9C0B6|Q96SI9	3.82163
P67775|Q15257	1.84086e+08		Q13422|Q9H5V7	43.7544		Q14847|Q8TBE7	3.82163
P62316|P62318	1.83468e+08		Q9UKT9|Q9H5V7	43.7544		Q5T0F9|O95670	3.82163
O75832|P06400	1.83012e+08		Q7L5N1|P60228	42.7808		O43920|Q9GZX9	3.82163
Q13547|O94776	1.81046e+08		Q86TG7|Q8IUQ4	41.511		Q96IY1|Q8N895	3.82163
P62304|P62316	1.77014e+08		P52306|Q92845	33.2488		Q9Y6W6|Q9NQ48	3.82163
Q9Y5R8|O43617	1.75204e+08		Q9Y6B7|O60566	33.1267		Q8N7L0|Q9Y624	3.82163
Q13616|Q9UKB1	1.73983e+08		P78536|Q13257	32.9886		Q8NHQ1|Q9ULQ0	3.82163
P62195|P25787	1.73169e+08		Q99996|Q15642	32.7634		Q9Y222|Q96M11	3.82163
P35609|Q08043	1.71736e+08		Q06787|Q7Z417	32.4666		Q9UJU6|Q9H4I8	3.72751
O14818|P28074	1.71476e+08		Q9H8Y8|P01135	32.4063		O75190|Q9H094	3.71472
P30153|P63151	1.71166e+08		Q96T60|Q13426	31.6495		Q92478|O43824	3.71429
P17980|P62195	1.70914e+08		Q9UBU8|Q9Y605	29.4676		Q9NP66|Q9UJW8	3.65902
P78396|P24941	1.70344e+08		P63244|Q9NRC1	28.6859		P47870|P55769	3.64472
P14317|P07948	1.69754e+08		Q9NR12|Q9NRR5	28.408		Q7Z5A8|Q8NA54	3.60525
Q15437|P53992	1.69375e+08		O76041|Q15942	27.455		Q8TDD1|Q7Z304	3.56477
Q92598|P34932	1.69165e+08		Q08379|Q9H8Y8	26.7583		Q9H981|Q14210	3.53383
Q04917|P61981	1.67587e+08		P40933|P31785	25.9607		Q86WK7|O95397	3.52712
P54619|P54646	1.6653e+08		O43491|P42261	25.9484		Q6IN84|P11684	3.49725
P62913|P46777	1.65532e+08		O95273|Q92905	25.4464		Q6GMR7|P25800	3.44053
O15379|O75376	1.64711e+08		Q9UER7|P14672	25.0563		Q9NQR4|Q9UNA1	3.44053
Q9Y4Y9|P62312	1.64303e+08		Q13049|Q9NRR5	23.5933		Q96GD3|Q5VSL9	3.43155
P35226|Q99496	1.63193e+08		P06454|Q01105	23.4938		O95684|Q96MA6	3.38516
P20618|P28072	1.59181e+08		P68431|Q8WTS6	23.4482		P84077|Q9UL01	3.37325
P62191|P43686	1.53577e+08		P51151|Q7Z6M1	23.2594		Q16576|O43597	3.36768
P25788|Q8TAA3	1.5221e+08		P07355|P35232	23.1891		O60513|Q9UGJ1	3.36503
P25205|P33991	1.52149e+08		Q9BT40|Q8TBB1	22.818		P63092|Q9UNK4	3.34999
P52657|P52655	1.49546e+08		O43752|O75379	22.1574		Q8NA66|Q9Y242	3.339
P31749|P49841	1.49513e+08		Q8TD31|P49675	19.8974		Q5VWX1|Q9Y5J7	3.3248
P68400|P19784	1.49508e+08		P03372|Q9NPJ4	19.5422		Q9NTM9|Q9HC07	3.30711
P62304|P62318	1.45626e+08		Q96CW1|P55087	19.483		P78539|Q96N20	3.27684
O14818|P28062	1.43322e+08		Q16633|Q8IUQ4	19.0772		O60220|Q8N5M4	3.25969
O43741|P54619	1.41694e+08		P49916|Q96FI4	18.7863		Q86V42|O43513	3.23033
P61956|P63279	1.39663e+08		Q14008|O75410	18.6592		Q9UHL4|Q9UL01	3.21081
Q9Y297|P63208	1.38933e+08		P40933|P14784	17.8053		Q9H1C7|Q86VK4	3.18416
P20618|P28074	1.38824e+08		P05549|P04637	17.2726		Q9NVL1|Q309B1	3.18416
Q99942|P61077	1.37972e+08		P34130|Q16620	17.1801		Q8N688|P01148	3.18416
Q9Y478|P54619	1.37673e+08		Q9Y232|P68431	17.0751		Q96HQ2|Q9Y2X9	3.18416
P62195|P28066	1.36361e+08		Q99623|P06454	16.7261		Q9BQA9|Q9HB89	3.18416
P10644|P17612	1.35648e+08		Q04206|Q9UBK9	16.5675		P58505|O95825	3.18416
Q99832|P40227	1.30878e+08		O60566|O76070	16.3284		Q96IV6|Q8N431	3.18416
P50990|P40227	1.30878e+08		Q01543|P15976	16.3241		O95985|Q8WVJ9	3.18416
Q15054|P12004	1.30182e+08		P52435|Q01826	16.3084		P09105|Q6UWQ7	3.18416
O43747|P56377	1.29667e+08		P30279|P35227	16.2768		P06746|Q96HA9	3.18416
P21675|P20226	1.27546e+08		P14416|Q9H4G0	15.2603		Q13137|Q96LI9	3.18416
P30279|P11802	1.27394e+08		P14784|P60568	15.1921		Q7Z4G1|Q969X5	3.18416
P49721|P28072	1.26348e+08		Q14192|P24593	14.2085		P39905|O75380	3.17721
P49721|P28074	1.23959e+08		P31785|P05112	14.0365		O14520|Q8N695	3.15965
O94973|P63010	1.23283e+08		P15407|P23025	13.3719		Q9NS85|Q96MS0	3.09552
P25786|Q99436	1.23113e+08		P15336|P63279	13.1491		Q9H9A5|Q9NZN4	3.08962
O15143|O15511	1.22801e+08		Q6ISB3|Q8TE85	12.6431		P09067|Q9NZE8	3.08022
O95816|P11142	1.21888e+08		O14936|Q9Y2J0	12.5781		Q9UHH9|Q9Y237	3.03066
P62280|P62241	1.21555e+08		Q03188|Q9UER7	12.5618		Q86WU2|Q9NSU2	3.00726
P28072|P28062	1.20982e+08		Q9UPM8|P84077	12.3072		Q9BRK5|Q7Z340	2.9888
P51959|P04637	1.20803e+08		Q96G23|P27449	11.5689		Q7Z3H0|Q9Y5Z7	2.97724
P05198|P41091	1.20656e+08		Q08379|Q9P289	11.487		Q9C0I1|Q9BY11	2.97104
P78396|P06493	1.20494e+08		P14778|P18510	10.9556		Q5TGI0|P50453	2.95518
P25787|P28062	1.19875e+08		P47870|O60296	10.6325		Q96L91|P55769	2.94942
P62847|P62753	1.19109e+08		Q14511|Q02363	9.80929		P01233|Q8WXF8	2.9302
Q13224|Q05586	1.18166e+08		P01579|P15260	9.67382		Q6VVB1|Q15120	2.91048
P55055|P19793	1.1605e+08		Q14192|P49810	9.61394		Q9BUH8|Q16540	2.90619
O43929|O43913	1.15602e+08		Q8TAE8|P40763	9.56284		P08133|P51580	2.90274
P17987|P50990	1.14146e+08		Q14005|O14974	9.37381		Q9HC23|Q5T5P2	2.8973
P62701|P62753	1.14101e+08		Q9UBU8|Q96HT8	9.30893		Q8TDG4|Q15063	2.8973
P62701|P62241	1.14101e+08		P17980|Q9NNW7	8.83585		Q9BVC4|P02585	2.84818
P62249|P62851	1.12303e+08		Q06787|Q9UHK0	8.62556		P01148|Q9H0M4	2.84049
Q15843|P15374	1.11125e+08		O60260|Q9BT88	8.11522		P50995|Q6NXP2	2.84049
P35251|P40937	1.09306e+08		Q9Y3C5|O95630	7.95111		P27930|Q15012	2.84049
Q8NDV3|Q9UQE7	1.09205e+08		Q06587|Q8N488	7.28064		P60006|P14920	2.84049
P52657|P20226	1.08457e+08		Q8NFJ9|O75955	7.11384		Q9BRD0|Q6P1J6	2.84049
P43686|P51665	1.06452e+08		P51948|Q13330	7.11255		P50876|Q8TBE7	2.84049
P41594|Q86YM7	1.05932e+08		P62937|Q16849	6.68772		P30542|Q96HV5	2.84049
Q8TBC4|Q969M7	1.05295e+08		Q9NYL2|Q06730	6.37008		O95460|Q8IUX1	2.84049
P40306|P28070	1.04996e+08		P63244|Q9Y561	6.30753		Q9BR76|Q9NX95	2.84049
P31930|P22695	1.04941e+08		P49407|P12272	5.87982		Q495B1|P28290	2.84049
P60900|P28062	1.04245e+08		P03372|Q5QJE6	5.79651		Q8N128|Q9NXK8	2.84049
P78371|P40227	1.03883e+08		Q08881|P62937	5.71964		Q9NZQ7|Q99969	2.84049
P25786|P49720	1.03377e+08		P21580|Q15025	5.63033		Q86UW2|Q9Y5E4	2.84049
Q12834|Q13257	1.02608e+08		O00167|P04899	5.08618		P21145|Q63HM2	2.84049
P30281|P24941	1.01383e+08		P53611|Q12974	5.0329		Q53GS7|Q9P242	2.84049
P08574|P47985	1.01348e+08		O95831|Q9Y3Q8	4.76073		O43609|Q9H6L2	2.84049
P43686|O00487	1.00946e+08		Q9UI36|P63279	4.62069		P09543|P0DJI9	2.84049
P43686|P25787	1.00946e+08		Q8NFJ9|P68104	4.41832		Q12980|Q6ZMI0	2.84049
P25054|P35222	1.00925e+08		P17655|O43903	4.31793		Q86VR2|Q96KS9	2.84049
Q5VVQ6|P55072	1.00487e+08		Q13643|P57682	4.29212		P31431|P01374	2.84049
P36897|P37173	1.00031e+08		Q6IE81|P40337	4.25399		O15460|Q9BWG6	2.84049
P63104|P06576	9.9839e+07		P63167|P25963	4.23839		A5D8W1|Q8WY91	2.84049
P62191|P25789	9.93839e+07		P25815|P23297	3.94724		Q8NEU8|Q9Y237	2.81988
P62191|P28066	9.93839e+07		P27482|Q9HD67	3.5464		Q9Y232|P50225	2.80829
P25705|P30049	9.93723e+07		Q13901|Q99598	3.24028		Q8NI17|P83876	2.79097
P52435|P19387	9.7653e+07		Q15365|Q9Y3Q8	3.17663		Q9H6K4|Q9H1Q7	2.7714
P62310|Q9Y4Y9	9.70161e+07		Q9UNS2|P05107	3.08764		Q9BWP8|Q9UNK0	2.75016
P25963|Q04206	9.68132e+07		P11168|P52292	2.84961		P25105|P13693	2.75016
Q09472|P10276	9.67971e+07		O00165|P01583	2.84049		Q9UQV4|P57771	2.75016
P62263|P61247	9.6483e+07		P35609|P03950	2.70102		Q9Y2U2|Q8NE79	2.75016
P42345|Q8N122	9.60333e+07		Q86SQ9|P61916	2.53792		Q9BYG7|O43272	2.72782
P42768|O43516	9.56184e+07		Q9HCU9|Q13287	2.49397		Q86SX3|Q7RTV0	2.65888
P20618|P28062	9.38068e+07		Q15714|P13693	2.10576		Q9GZP4|Q6EMK4	2.60096
P20839|P12268	9.31461e+07		Q16633|P14859	2.07848		P51946|Q8NGF6	2.6004
P28074|P28072	9.25775e+07		Q9Y2B0|Q8WY64	1.95858		Q13562|Q15121	2.59252
P62314|P62316	9.11414e+07		Q8IWZ6|O75955	1.77075		Q9H361|Q8N4V2	2.58703
P35998|O14818	9.01368e+07		Q8TE69|P02795	1.76129		Q96RQ1|Q11201	2.57917
P10321|P61769	8.92213e+07		P43358|O75832	1.73765		P30838|Q9NUL3	2.57795
O00327|O15516	8.91083e+07		P60228|P09914	1.54227		P32969|Q7RTR8	2.56953
Q96H20|Q9BRG1	8.89845e+07		P07307|Q96G23	1.4145		Q8IX18|Q9BPV8	2.54943
O43747|P61966	8.89329e+07		Q9Y580|Q13435	1.28315		O15120|Q9Y3F4	2.52758
P25786|P28074	8.87002e+07		Q13126|Q8WY64	1.2637		Q9HAI6|P62851	2.5274
P35579|P60660	8.84873e+07		O95400|Q92530	1.24376		P15336|Q96C23	2.5274
P00533|P04626	8.82575e+07		Q8TAE8|P24522	1.18289		Q9H7Z7|Q8N114	2.5274
Q99460|Q13200	8.79759e+07		P07306|Q96G23	1.173		O95985|Q5GH73	2.5274
Q15436|P53992	8.69595e+07		Q9HCU9|Q969G3	0.948401		Q9UGQ2|Q96HE9	2.5274
P12004|Q9UBZ9	8.60275e+07		Q14653|P05120	0.930139		P54317|Q96EL2	2.5274
O00232|Q13200	8.56856e+07		Q9HAZ1|Q9BZL1	0.888725		P15336|Q9BW85	2.5274
Q14141|Q16181	8.55079e+07		P49069|O14836	0.886936		Q5BN46|Q5J8M3	2.5274
P62333|P43686	8.46375e+07		P07498|P60228	0.882578		Q8TDY3|Q6PEX3	2.51512
Q05193|P62993	8.4362e+07		P58062|P02795	0.86918		Q6UWQ5|Q8WTP9	2.51512
P53618|P48444	8.31324e+07		O75410|O95619	0.856846		Q9P2Z0|Q12816	2.51442
P61158|O15144	8.29687e+07		Q8NFJ9|Q9UPT5	0.497141		Q8NEC7|Q7Z6K4	2.51039
P62191|P25787	8.27657e+07		Q96BH3|Q02535	0.333179		Q5VUJ6|O75251	2.50733
Q13418|Q9NVD7	8.20192e+07		O15457|P61758	0.286956		P04217|Q7L592	2.49352
P22392|P15531	8.19388e+07		P62308|O75410	0.0842592		O95825|Q5VU13	2.48772
Q9UNE7|P07900	8.17401e+07					O00585|Q5SY16	2.46874
P62993|Q07890	8.05619e+07					Q8N9W4|Q15388	2.44745
P20749|Q00653	8.04874e+07					Q9HBG7|Q8N584	2.44703
Q13144|Q9NR50	8.03199e+07					Q9UBM1|Q9H0H5	2.42937
P27037|P08476	8.0217e+07					Q6P4E1|Q6ZU82	2.416
P62333|Q9UNM6	8.01594e+07					P10767|Q96HM7	2.41402
P25963|P19838	7.97793e+07					O75309|Q8N0X4	2.41402
P27540|Q99814	7.97535e+07					Q6P5X5|Q8TC76	2.36668
Q9Y294|P68431	7.88901e+07					Q9H741|Q5GFL6	2.36668
P17980|O00231	7.82031e+07					Q9NTI7|Q1W4C9	2.36668
P62333|P35998	7.77886e+07					Q9BXS6|O00755	2.36668
Q9NSA3|P35222	7.74278e+07					P09912|O00267	2.36668
O95067|P06493	7.73898e+07					Q8IY22|P48230	2.36668
P01732|P10966	7.73618e+07					Q15018|Q8TDB4	2.36668
Q99816|Q99816	7.73058e+07					Q8N9E0|Q9NZH6	2.36668
P04626|P21860	7.69532e+07					Q9Y5U2|Q8TF39	2.36668
P49720|P28072	7.6275e+07					Q9H4I9|Q86SS6	2.36668
P63165|P63279	7.61677e+07					O75787|P10073	2.36668
P61981|P27348	7.52505e+07					Q96L11|O95125	2.36668
Q10567|Q9BXS5	7.51926e+07					Q8N8S7|Q9BU68	2.36668
P23921|P31350	7.31864e+07					O95467|Q9UNK4	2.35474
P19784|P67870	7.25187e+07					P80404|Q8IY51	2.31509
P11021|P11142	7.23133e+07					P55957|Q9HAH1	2.3059
P62875|P62487	7.21005e+07					P54710|Q9ULK6	2.3008
P24385|P24941	7.18586e+07					P21741|Q13496	2.3008
P43686|Q9UNM6	7.15761e+07					Q9UPQ0|O00476	2.29142
P09493|P07951	7.09913e+07					Q6UWR7|O95149	2.29142
Q9Y333|P62312	7.09064e+07					P09172|P58173	2.26361
P63010|P53680	7.07197e+07					P53680|O60759	2.24351
P43686|O00232	7.03664e+07					P53611|Q15750	2.1868
P55072|Q14CS0	7.02059e+07					Q5SW96|P22557	2.18428
P49721|P28062	7.00586e+07					Q4VCS5|Q96IQ9	2.16007
P08237|Q01813	6.99572e+07					P27701|Q9NVV9	2.15116
P35998|O00231	6.98292e+07					Q8WU76|Q5GH77	2.14734
P20702|P05107	6.84058e+07					Q6PJQ5|Q6NUQ4	2.14734
Q06830|Q13162	6.81142e+07					Q86WH2|P11172	2.13762
P62333|P60900	6.75799e+07					Q8NI60|Q9NQW5	2.12594
P55884|P60228	6.74142e+07					Q8TD20|Q6NUM6	2.12212
Q9UJX3|P30260	6.70327e+07					Q8IYS4|Q5UAW9	2.1077
P35998|P28066	6.68135e+07					P31358|O75626	2.09295
P62837|Q05086	6.63514e+07					Q5T160|Q8IW36	1.985
P61077|Q05086	6.63514e+07					O00330|Q92748	1.98143
P62191|O14818	6.56945e+07					Q6PHW0|P78395	1.97662
P07900|Q15785	6.55947e+07					Q9NS18|O95397	1.94005
Q6PD62|Q8WVC0	6.55511e+07					Q8TDY3|Q9H2J4	1.93875
P16144|Q15149	6.33268e+07					P21589|P57052	1.93243
Q16623|Q15833	6.32745e+07					Q8N7L0|O60763	1.92362
P49368|Q92526	6.31053e+07					O95825|P36956	1.91701
P30281|P11802	6.28501e+07					Q9BZS1|P04733	1.91701
P62258|Q04917	6.27863e+07					A6NM10|Q99612	1.91701
P27361|P36507	6.23179e+07					Q9HBG6|P51688	1.89691
P28062|P28065	6.22309e+07					Q9UKU9|Q96D46	1.88756
P17980|P49721	6.2073e+07					Q9UQ10|Q5SWH9	1.88756
P43686|P25789	6.2073e+07					P28331|P09430	1.88756
P19793|P10827	6.17235e+07					Q9BRP7|Q9H6F2	1.87853
P40692|P54278	6.14329e+07					Q9HBZ2|P60985	1.87853
P62333|P25788	6.13456e+07					Q9UNF1|Q96FA3	1.87853
P19838|Q04206	6.12647e+07					Q6UXV4|Q86TN4	1.87853
P25786|P49721	6.11589e+07					Q3KR37|Q9UJK0	1.87853
P62333|P62191	6.05828e+07					Q9NR19|Q6P444	1.87853
P28070|P28074	5.97806e+07					Q9BYR5|Q96MU7	1.87853
P12004|P35251	5.95826e+07					Q9NU53|O95868	1.87853
P62136|P36873	5.82892e+07					Q8IZ57|P25445	1.87216
P01375|P19438	5.8245e+07					Q6UVY6|Q9NWU1	1.87128
P61158|P59998	5.7828e+07					Q99706|P61916	1.83405
P25787|P28074	5.74365e+07					P01233|P61586	1.83145
P43686|P60900	5.68128e+07					Q15063|Q96BW1	1.8188
P07900|P31948	5.66697e+07					Q92613|P31213	1.80559
P21281|Q9Y5K8	5.63446e+07					Q16739|Q8WXF0	1.80287
P25205|P33993	5.61583e+07					Q96LL3|Q5T5D7	1.78915
Q9UBS4|P11021	5.60518e+07					O15432|Q8N9Y4	1.78915
P08238|Q15185	5.59106e+07					Q6PIJ6|Q15287	1.76129
O96017|P53350	5.5814e+07					Q9NXV6|Q8IVH2	1.72164
P62195|O00232	5.54263e+07					Q14435|Q6P1K1	1.72164
O15143|P61158	5.4951e+07					Q9BYD5|P25116	1.72164
P61970|P62826	5.48054e+07					Q92561|Q6DKI1	1.72164
P02549|P11277	5.46999e+07					Q14031|Q86V88	1.72073
O60921|O60671	5.45646e+07					Q8N6T7|Q96NG8	1.69548
P07900|P07900	5.4469e+07					O14521|Q96D09	1.69347
Q13547|Q13547	5.41173e+07					A6NK59|Q9H0E7	1.69218
Q03518|Q03519	5.3801e+07					P02511|Q5TAP6	1.67066
P31749|P31751	5.37685e+07					P62310|Q8TCD5	1.66988
P35251|P40938	5.35236e+07					Q86UC2|O75368	1.63188
P62875|P19387	5.33849e+07					Q8NHS0|O43427	1.63188
O15143|Q9BPX5	5.33714e+07					Q9UNI6|Q9UM82	1.63188
P28072|Q99436	5.32541e+07					P62955|Q9BS92	1.61582
Q15436|O95487	5.29069e+07					Q2TB18|Q96LR2	1.61582
P62333|P62195	5.28628e+07					Q92838|P31151	1.61344
P20036|P04440	5.27295e+07					Q96GS6|Q8N128	1.60275
P62826|O43592	5.2672e+07					Q96LT7|A0AV02	1.60275
P06576|P36542	5.25865e+07					P30825|P51814	1.58696
P62993|P27986	5.23874e+07					Q9NRX4|Q8IXX5	1.5818
Q9BQE3|P68371	5.23575e+07					P01215|Q5T7P3	1.5818
P12643|P36894	5.1808e+07					Q92546|Q9ULQ0	1.5818
Q13547|Q09028	5.17343e+07					Q9BTA0|Q68CL5	1.5818
P17980|P25787	5.16936e+07					P56597|Q8N2U0	1.5818
P13929|P09104	5.16074e+07					Q7Z4U5|Q9NUM4	1.5818
P42224|P40763	5.13438e+07					Q9UH90|Q9H244	1.5629
P54725|P54727	5.09782e+07					P61158|P12104	1.5499
P49841|P49841	5.07146e+07					Q8WV16|Q96EH5	1.52893
P60953|Q9BYG5	5.06713e+07					O43766|Q4ZJI4	1.52893
O00231|O00232	5.06555e+07					Q9BTM9|P41587	1.52893
P50991|Q99832	4.99355e+07					P11168|Q8TCC3	1.52215
Q05397|P12931	4.98887e+07					Q9H3H5|P24001	1.51758
P17987|P40227	4.97975e+07					Q96NX9|Q92506	1.49526
P48643|P40227	4.97975e+07					Q0VAF6|O95858	1.49361
Q16531|Q92466	4.95709e+07					Q4G1C9|Q9NQN1	1.42753
P35227|Q99496	4.94596e+07					O60566|Q3KNT9	1.42012
Q00987|O15151	4.93986e+07					Q96GE6|Q5SZD1	1.40296
P06493|P61024	4.92432e+07					P56277|A0MZ66	1.40296
O75530|Q09028	4.90197e+07					O95232|P0DJI8	1.39199
Q99942|Q96LR5	4.8839e+07					P55008|Q8N0U4	1.35324
P09467|O00757	4.8717e+07					O94929|Q9HCI6	1.34739
Q9UK22|P63208	4.86858e+07					Q96JG6|Q6PUV4	1.34629
P49005|P12004	4.85726e+07					Q86UU5|Q9C0F3	1.34629
P51965|Q05086	4.85669e+07					Q02818|Q96B01	1.34629
Q99942|P62837	4.83221e+07					P60033|Q96FN5	1.29823
P25789|Q8TAA3	4.80955e+07					Q6NXP0|Q6PHW0	1.28126
P28066|Q8TAA3	4.80955e+07					Q8NHS1|Q8N983	1.27217
Q7LG56|P31350	4.7784e+07					P01185|Q8TB37	1.2629
P01889|P61769	4.73364e+07					P54709|Q6NXN4	1.2382
P07900|Q15185	4.71485e+07					P01834|Q9UBV8	1.2205
P63151|P62714	4.68327e+07					P56539|Q92696	1.21293
Q13619|P62877	4.68196e+07					P01037|Q92643	1.2086
P28066|P28062	4.67753e+07					Q96CU9|P11169	1.19921
P62308|P62318	4.66729e+07					Q8WUU4|Q8NE65	1.1933
P04637|Q9H3D4	4.65538e+07					Q92826|Q8IZC7	1.18964
Q9Y4K3|P61088	4.65076e+07					P04798|Q9NP50	1.1757
P62195|P49721	4.63585e+07					Q96DG6|O75683	1.1757
Q16512|P61586	4.60355e+07					Q8N7X2|P21583	1.1757
P49736|P25205	4.59167e+07					Q96S44|Q96B21	1.1757
P35250|P40938	4.58498e+07					Q6ZUJ4|Q15527	1.1757
Q99942|P51965	4.52168e+07					Q9Y3Y2|Q16674	1.1757
Q99728|P38398	4.51186e+07					Q13515|Q7RTX9	1.1757
P20339|P62491	4.50744e+07					Q96N28|P29508	1.1757
Q02790|P08238	4.46789e+07					Q8WUU5|Q9H293	1.1757
Q9Y620|Q06609	4.40499e+07					Q9H825|Q96A73	1.1757
P40938|P40937	4.38977e+07					Q9NPB9|Q9H6F2	1.1757
P62333|P51665	4.32097e+07					Q2VPB7|Q8WVE7	1.1757
Q07869|P19793	4.30343e+07					P12644|Q5U649	1.1757
P35998|P25789	4.29765e+07					Q9BYR7|P61619	1.16747
P01912|P01903	4.26252e+07					Q5T5A8|P11309	1.16747
P01911|P01903	4.26252e+07					Q9NRG0|O43908	1.16747
Q13616|Q9Y297	4.22838e+07					Q9UNE7|Q7Z2X7	1.16747
P28068|P01903	4.22408e+07					P62330|Q05682	1.16136
P62195|O14818	4.17101e+07					A1A580|Q15274	1.16136
Q01081|P26368	4.16716e+07					Q96A65|Q9Y2Q1	1.16136
Q9UK45|P62318	4.15985e+07					Q9H9E3|Q6NX45	1.1503
Q9UQF2|P45983	4.13423e+07					O75223|P43630	1.14266
Q06323|Q9UL46	4.12198e+07					P24462|Q9HBL8	1.1364
P43686|O14818	4.10313e+07					Q93086|O00743	1.1364
P25787|Q8TAA3	4.07608e+07					P08637|P58417	1.10488
Q9Y294|P84243	4.05807e+07					P20807|P35908	1.10087
P62249|P39019	4.05401e+07					P35754|Q6ZS27	1.07621
Q92747|O15144	4.05368e+07					O43734|B6SEH8	1.06061
P09038|P11362	4.04279e+07					P84996|Q9UNK4	1.05997
P60709|P63261	4.03374e+07					Q6NXN4|Q8N9B8	1.05434
P04439|P61769	4.02013e+07					Q92843|P86397	1.00756
P49841|P49768	3.92927e+07					Q9NR22|Q99653	0.992747
Q02790|P07900	3.88275e+07					Q96PL5|Q5T1J6	0.9878
P25205|Q14566	3.87054e+07					P13928|Q0VAF6	0.982003
P25205|P33992	3.87054e+07					Q14582|O75570	0.970818
Q93034|Q9UBF6	3.83522e+07					P12724|P78330	0.969108
O14818|P28072	3.83177e+07					P21145|P62753	0.962748
P62993|P62993	3.80915e+07					O43820|Q7RTV0	0.952317
O95817|P11142	3.7951e+07					P55789|O14668	0.950105
P08238|P31948	3.79221e+07					P12724|P0C0S5	0.945651
P40939|P55084	3.79091e+07					P58340|O14921	0.895724
P61964|Q6UXN9	3.77958e+07					Q9Y2V0|P04733	0.8888
P62847|P62701	3.76173e+07					P15516|P29218	0.8888
Q9UKT5|P63208	3.7399e+07					Q96DY2|Q96GX9	0.8888
P61020|P51149	3.71418e+07					O00330|Q13183	0.882626
Q92905|Q7L5N1	3.69351e+07					Q6NUI1|P84101	0.877957
O94906|O75643	3.64543e+07					Q7Z2K6|Q96GU1	0.877957
P60900|Q8TAA3	3.63962e+07					Q8N143|P15586	0.86724
P15056|Q02750	3.59457e+07					Q8N8A2|Q9BQ66	0.863243
Q96A72|Q9Y5S9	3.59372e+07					P40692|Q9BX97	0.850346
P62314|P62318	3.58084e+07					Q53TS8|Q13190	0.825167
Q07817|P55957	3.54852e+07					P48039|Q86UA1	0.812057
P28074|Q99436	3.53158e+07					P49711|Q7Z5H4	0.812057
O14786|Q14563	3.51143e+07					P39905|Q96K30	0.810673
P51692|P40763	3.5012e+07					P0CG04|P20366	0.801782
P05067|Q92870	3.46826e+07					Q9NRR3|Q8NCQ2	0.8011
O00232|Q15008	3.45165e+07					Q8NAT1|Q9NQ25	0.727814
P62333|O00232	3.42973e+07					Q9H2A2|Q9NWY4	0.7126
P20339|P51149	3.4292e+07					P62820|Q9HCN2	0.712018
Q15046|Q15046	3.42696e+07					Q8N9H9|Q8WVZ1	0.69728
P25786|P28072	3.42147e+07					Q9Y471|P05388	0.69728
Q13362|P62714	3.40479e+07					Q16281|P78358	0.69728
Q9UBT2|P55854	3.36504e+07					P01880|O75400	0.69728
P24928|P62487	3.35123e+07					Q8N9W4|A6NJ78	0.69728
P15692|P35968	3.33999e+07					Q8WWF3|Q9GZZ9	0.664118
P61769|P13747	3.3239e+07					P05141|Q96MZ4	0.659499
P17980|O14818	3.27524e+07					Q8TDX5|O60664	0.644922
P28066|P28072	3.27483e+07					Q53FT3|P52743	0.634782
P25789|P28072	3.27483e+07					Q9BQ66|Q8TBZ3	0.54305
P12694|P21953	3.26454e+07					Q9P0J0|Q9Y5G3	0.520756
Q92793|Q92831	3.26079e+07					P59020|Q9NYF3	0.4364
Q09472|Q92831	3.26079e+07					A4QN01|P13727	0.4364
P11277|Q13813	3.24189e+07					Q8NBB2|Q8N0U4	0.418682
Q04771|P36897	3.22675e+07					P59037|Q8WVK7	0.418682
Q9Y333|Q9Y4Y9	3.15243e+07					Q9Y6Z2|Q13227	0.3496
P15311|P35240	3.15016e+07					Q8TF63|Q53FD0	0.278106
P08574|P14927	3.14283e+07
P25788|Q15008	3.14146e+07
Q96RI1|P19793	3.12824e+07
Q9UJX3|Q9UJX2	3.11247e+07
Q14232|Q13144	3.11046e+07
Q9UNM6|Q15008	3.10375e+07
P43686|P49721	3.08881e+07
P63000|P15498	3.07601e+07
P27348|P63104	3.07579e+07
Q13363|P56545	3.07166e+07
Q13501|Q9Y4K3	3.05709e+07
P62191|P60900	3.02397e+07
P28070|P28065	3.01426e+07
P38606|Q9Y5K8	3.00913e+07
Q13303|P16389	3.00449e+07
P49959|Q92878	2.96575e+07
Q9Y333|P62316	2.96202e+07
P20585|P12004	2.93334e+07
Q92608|P63000	2.92615e+07
P25054|P49841	2.92612e+07
P62310|O95777	2.8877e+07
Q9Y6K1|Q9UBC3	2.88585e+07
P63104|P35579	2.85648e+07
P62750|P42766	2.84673e+07
Q15628|Q12933	2.8465e+07
P78352|Q05586	2.83696e+07
P31946|P27348	2.83691e+07
Q13133|P48443	2.81387e+07
P19388|P24928	2.80504e+07
Q96PU5|P62837	2.80419e+07
O00231|O43242	2.79823e+07
P62258|P27348	2.79607e+07
Q9Y3B2|Q96B26	2.79039e+07
P35222|P49768	2.79021e+07
P10276|P48443	2.74571e+07
P31749|P49840	2.70951e+07
P49841|Q05513	2.70877e+07
P52907|P47755	2.70769e+07
P68400|P68400	2.70499e+07
P35222|P49841	2.70016e+07
P61353|P62888	2.68708e+07
Q04771|P27037	2.68124e+07
P49721|P28065	2.67255e+07
P08648|P05556	2.65475e+07
P50991|P40227	2.64271e+07
P49137|Q15759	2.64064e+07
P49720|P28074	2.63753e+07
O00487|P55036	2.62656e+07
P12004|P40938	2.61705e+07
P04637|O15350	2.59682e+07
P62244|P62081	2.59015e+07
P78371|Q92526	2.57672e+07
Q99613|P60228	2.57656e+07
Q16777|P68431	2.57431e+07
Q14152|P55884	2.57295e+07
P25786|P28070	2.57266e+07
P31946|P61981	2.55791e+07
Q13616|Q13618	2.55561e+07
Q13616|P62877	2.55081e+07
P18075|O00238	2.52838e+07
P62191|O00231	2.52825e+07
P55036|Q15008	2.52184e+07
P59998|O15511	2.52134e+07
P35998|P25787	2.51887e+07
P62993|O14492	2.51685e+07
P01909|P01920	2.49622e+07
P50991|P48643	2.48172e+07
Q13616|Q15843	2.47153e+07
O60684|Q14974	2.47097e+07
P27037|P09529	2.46929e+07
P62277|P62244	2.45629e+07
Q9UK45|O95777	2.45352e+07
P53618|P61923	2.44997e+07
Q00987|P63165	2.44357e+07
Q15544|Q16514	2.42388e+07
P24941|P12004	2.41584e+07
P03372|P10276	2.40722e+07
Q9BXS5|P63010	2.38038e+07
O15169|O14640	2.34349e+07
P46777|P18124	2.336e+07
Q15365|Q15366	2.32771e+07
O00487|Q99460	2.31584e+07
P83731|P46777	2.3092e+07
P13612|P26010	2.28594e+07
O00148|Q13838	2.28442e+07
P55884|Q13347	2.27486e+07
P37231|P19793	2.27429e+07
Q00653|Q01201	2.27204e+07
Q06609|O43542	2.26334e+07
Q92747|P61158	2.26279e+07
P28066|P28074	2.24801e+07
Q14919|Q01658	2.22384e+07
O60832|Q9NX24	2.21482e+07
P62820|P51149	2.21107e+07
P38606|P36543	2.18636e+07
P25788|O00231	2.1826e+07
P16104|P68431	2.15118e+07
Q03181|P19793	2.13784e+07
P51668|Q05086	2.13204e+07
P62195|Q15008	2.12386e+07
P12643|O00238	2.12315e+07
P35222|Q9NQB0	2.10391e+07
P61769|P55899	2.0917e+07
P31751|O15530	2.08337e+07
P08708|P08865	2.083e+07
Q99613|Q7L2H7	2.07518e+07
P13631|P48443	2.07317e+07
Q6P1J9|Q6PD62	2.05575e+07
P62993|Q8WUM4	2.05514e+07
P31749|P84022	2.05248e+07
P30876|P19387	2.04843e+07
P17980|P60900	2.03919e+07
P25787|Q15008	2.03919e+07
P62333|O14818	2.03919e+07
Q9Y333|P62310	2.02347e+07
Q00577|Q96QR8	2.02276e+07
P62312|O95777	2.01645e+07
Q99460|Q15008	2.01478e+07
P40306|P49720	2.01047e+07
Q07955|Q13242	2.00723e+07
P10826|P19793	1.98978e+07
P31946|Q92934	1.98472e+07
Q9UJX3|Q13042	1.97159e+07
P25786|P28062	1.96874e+07
P62993|Q96B97	1.96472e+07
P48507|P48506	1.9624e+07
P51812|P28482	1.95776e+07
P26232|P35222	1.95339e+07
P62380|P52655	1.95171e+07
P62195|P60900	1.94619e+07
P62195|P25789	1.94619e+07
Q99933|P11142	1.94564e+07
P68363|Q9BQE3	1.93832e+07
Q92747|Q9BPX5	1.92511e+07
Q15291|P61964	1.92481e+07
P24534|P26641	1.90905e+07
P25787|P28072	1.90351e+07
Q06187|P43405	1.89475e+07
Q9NRM7|P46937	1.88426e+07
P49407|P32121	1.88106e+07
O75469|P19793	1.8807e+07
P35222|O14907	1.87723e+07
Q00266|P31153	1.874e+07
P68371|P07437	1.87069e+07
P24941|P50613	1.86373e+07
P45973|O43463	1.8599e+07
Q8TAA3|P28070	1.8565e+07
P62277|P62081	1.83445e+07
P04049|P12931	1.83117e+07
O00231|Q15008	1.82084e+07
P62333|O00487	1.80968e+07
P83731|P18124	1.80294e+07
P60866|P23396	1.79255e+07
P55036|P51665	1.78608e+07
P49720|P28062	1.78224e+07
P05067|P49757	1.76728e+07
P07900|Q9Y2Z0	1.76479e+07
P15056|P01112	1.76075e+07
P18124|P62917	1.75766e+07
Q00526|P61024	1.75439e+07
O14964|Q92783	1.75431e+07
P49418|Q05193	1.73882e+07
Q13200|O43242	1.73728e+07
P12004|P13051	1.73194e+07
P19387|P62487	1.72639e+07
P62333|P25787	1.71918e+07
O00232|O43242	1.71906e+07
P17980|O00232	1.71699e+07
Q96IV0|P54727	1.71063e+07
P15692|P17948	1.70106e+07
O43837|P51553	1.70104e+07
Q9P1U1|O15145	1.69463e+07
O15143|Q9P1U1	1.69463e+07
Q99942|P61086	1.69281e+07
Q15459|Q12874	1.68549e+07
P56945|P62993	1.6849e+07
P62191|P49721	1.68063e+07
Q9Y333|P62304	1.6703e+07
P46778|P46777	1.66974e+07
O14777|Q9HBM1	1.66566e+07
Q99819|P61586	1.65935e+07
Q8TAA3|Q99436	1.65676e+07
P62244|P46781	1.65176e+07
O94979|P55735	1.649e+07
P31749|P07900	1.61569e+07
P25786|P20618	1.60479e+07
O75607|P06748	1.5944e+07
P11388|Q02880	1.58884e+07
P17980|Q13200	1.57758e+07
Q9Y4P1|Q9GZQ8	1.57635e+07
Q09028|Q16576	1.57161e+07
Q9P2W1|Q9BWT6	1.5517e+07
Q96B26|Q06265	1.54951e+07
P62310|P62318	1.54449e+07
P06576|P21281	1.54406e+07
P43686|P55036	1.52788e+07
Q9NVA2|Q16181	1.52713e+07
Q14683|O95347	1.5262e+07
Q16665|P40337	1.51366e+07
O60683|O00623	1.50657e+07
P62249|P60866	1.49585e+07
P20248|P11802	1.49476e+07
P62191|O00487	1.49227e+07
Q16644|Q16539	1.47562e+07
P30153|P67775	1.46636e+07
Q99460|P55036	1.46128e+07
P43405|P07948	1.45796e+07
Q06187|P07948	1.45796e+07
Q13217|P11142	1.45062e+07
P43686|Q15008	1.44527e+07
P14635|O95067	1.44291e+07
O43242|P55036	1.43486e+07
Q15797|P84022	1.43469e+07
Q8IZP0|P00519	1.42923e+07
O95352|P60520	1.42676e+07
P84098|P62750	1.42409e+07
P61160|O15144	1.42272e+07
Q12834|P30260	1.42137e+07
Q9UBE0|P61956	1.41815e+07
O43187|Q99836	1.41771e+07
O14818|O00231	1.41712e+07
O14965|O14965	1.41601e+07
P06239|P08575	1.41102e+07
P62195|P54727	1.40974e+07
P61769|Q30201	1.40237e+07
Q92696|P53611	1.39858e+07
P61981|P61981	1.39586e+07
Q14232|P49770	1.38169e+07
O43318|Q9UBE8	1.38091e+07
Q6PD62|Q8N7H5	1.37077e+07
P40306|P28072	1.36856e+07
Q13315|Q13535	1.36662e+07
P55036|Q9UMX0	1.36425e+07
P62191|P51665	1.36285e+07
P62191|O00232	1.36285e+07
P07900|Q08752	1.36232e+07
P35998|P49721	1.35989e+07
P62993|P19174	1.35697e+07
Q9NVP2|P84243	1.3522e+07
Q00534|P06400	1.34619e+07
P43246|P52701	1.34313e+07
P22087|O00567	1.33839e+07
P63098|Q08209	1.3356e+07
Q15796|O15105	1.32253e+07
P62333|Q15008	1.3217e+07
Q13616|Q9UBF6	1.31889e+07
Q92922|Q96GM5	1.31497e+07
Q13098|Q9UBW8	1.31266e+07
Q13362|P30153	1.31084e+07
P51617|O43318	1.3016e+07
P52565|P08134	1.29675e+07
O00303|O15372	1.28957e+07
P62258|P62258	1.28524e+07
Q9Y6N9|Q495M9	1.28244e+07
P21281|P36543	1.28047e+07
P00533|O60674	1.27865e+07
O14770|P40424	1.27339e+07
O60683|P50542	1.2715e+07
P52272|P09651	1.27019e+07
P28066|O00231	1.26538e+07
P01019|P00797	1.26039e+07
P22004|O00238	1.25971e+07
P62280|P62277	1.25927e+07
P62280|P62701	1.25927e+07
P62280|P62244	1.25927e+07
P00533|P29353	1.25777e+07
P08238|Q08752	1.25651e+07
P11142|O43765	1.25423e+07
Q99728|P04637	1.24885e+07
P43487|P62826	1.24731e+07
P61769|P30511	1.23976e+07
P63104|P63104	1.23951e+07
P61081|Q13564	1.23579e+07
P17987|Q92526	1.23518e+07
P48643|Q92526	1.23518e+07
Q13705|P08476	1.23174e+07
Q07817|O43521	1.2289e+07
Q9UJY5|Q9UJY5	1.22627e+07
P28070|P28062	1.2252e+07
Q99436|P28062	1.2252e+07
P29083|P29084	1.22394e+07
Q13480|P62993	1.22017e+07
O95835|Q13043	1.21924e+07
P31749|P23443	1.21834e+07
P17980|P25786	1.21512e+07
P24941|Q00534	1.21498e+07
Q9Y6Q5|P63010	1.21344e+07
P56524|Q9UQL6	1.2064e+07
P09874|Q9UGN5	1.20633e+07
P28067|P28068	1.20567e+07
P17980|P55036	1.19939e+07
P04049|P01112	1.19565e+07
O14901|Q96ST3	1.1803e+07
O95782|Q9Y6I3	1.17775e+07
P24928|P30876	1.17531e+07
Q9UJX5|P30260	1.17095e+07
P19388|P19387	1.16304e+07
Q92747|Q9P1U1	1.16175e+07
P52294|Q14974	1.16082e+07
P42771|Q00534	1.15847e+07
P19793|P11473	1.1561e+07
P31749|P42345	1.15598e+07
Q04917|P27348	1.15548e+07
P12644|P36894	1.14939e+07
O00231|Q99460	1.14758e+07
P50213|Q9P2R7	1.14124e+07
P38398|P16104	1.13958e+07
Q13490|P61077	1.1268e+07
Q13200|P51665	1.12609e+07
P17980|O43242	1.12483e+07
Q02543|P18124	1.12347e+07
Q9Y294|Q09028	1.12344e+07
O00231|Q13200	1.10735e+07
P31946|Q92574	1.10033e+07
Q71U36|P68371	1.09487e+07
P04637|Q96EB6	1.08712e+07
P62191|P55036	1.06981e+07
P27635|Q02543	1.06686e+07
P22736|P19793	1.06477e+07
P62993|P12931	1.06463e+07
P03372|Q15466	1.05705e+07
P19388|P36954	1.05575e+07
P60900|P28072	1.05077e+07
P43686|Q13200	1.04281e+07
O15534|O15055	1.04073e+07
P27986|P27986	1.03998e+07
P62913|P18124	1.03913e+07
Q13112|P12004	1.03797e+07
P05109|P06702	1.03733e+07
O95757|P11142	1.03542e+07
Q9Y4Y9|P62306	1.02716e+07
P25054|P35221	1.02646e+07
P53597|Q96I99	1.02302e+07
P16104|Q16778	1.02205e+07
P60520|Q9GZQ8	1.01645e+07
P68133|P51911	1.01624e+07
P43686|O43242	1.00438e+07
P62750|P62917	1.00133e+07
P08708|P61247	1.00133e+07
P62873|P04899	9.9558e+06
P63104|P25705	9.95039e+06
P00533|P12931	9.93577e+06
Q02750|P04049	9.8951e+06
Q9UNM6|O43242	9.86362e+06
O00232|Q9UNM6	9.86362e+06
P63316|P19429	9.78376e+06
P00533|P21860	9.75918e+06
P46778|P62750	9.72886e+06
O00231|Q9UNM6	9.69264e+06
P51668|Q15386	9.68838e+06
P40429|P50914	9.68741e+06
Q15910|Q09028	9.59735e+06
Q9H4D5|Q9UKK6	9.57235e+06
Q16254|P06400	9.54507e+06
Q13547|Q16576	9.50965e+06
P08238|P08238	9.48782e+06
Q13596|Q96QK1	9.28138e+06
P55884|Q7L2H7	9.24084e+06
P84022|O15105	9.22969e+06
P62312|P62316	9.20255e+06
P51587|Q06609	9.19146e+06
P25789|P28062	9.15028e+06
P68366|P68371	9.12245e+06
Q14137|Q9GZL7	9.10875e+06
P12931|P35968	9.01455e+06
Q9Y5K6|P62993	8.99983e+06
P30260|P33981	8.99114e+06
Q15910|Q13547	8.98184e+06
Q13618|Q93034	8.96626e+06
O60674|Q06124	8.95155e+06
Q15459|Q15428	8.94803e+06
P52435|P62487	8.91279e+06
P51665|Q15008	8.89637e+06
Q9UBS5|O75899	8.89301e+06
Q99467|O95711	8.89089e+06
P05067|P05067	8.86549e+06
Q9UMS4|Q12874	8.82871e+06
P55884|Q99613	8.81441e+06
P35998|Q13200	8.78946e+06
P62195|Q13200	8.78946e+06
P11142|P31948	8.72731e+06
Q8TAA3|P49721	8.71544e+06
P61313|P62917	8.68222e+06
P21333|O75369	8.68165e+06
Q9NRM7|Q13043	8.66236e+06
Q14790|O15519	8.60451e+06
P19387|P36954	8.57619e+06
P27361|P27361	8.54081e+06
P68363|Q13509	8.53345e+06
Q13618|Q15843	8.47986e+06
P62195|Q99436	8.46764e+06
Q15003|O95347	8.43465e+06
P22087|P55769	8.29074e+06
O60832|Q9NY12	8.27459e+06
P17693|Q8N423	8.25832e+06
P46108|P62993	8.22097e+06
P62847|P46781	8.20137e+06
Q13158|P19438	8.1809e+06
P20248|P50613	8.16338e+06
P62333|P55036	8.15295e+06
P50613|P51948	8.13825e+06
P18621|P46778	8.13053e+06
P14635|P33552	8.12753e+06
P62424|P62244	8.08889e+06
P17980|Q99460	8.01665e+06
Q9BPX5|O15144	8.00927e+06
Q06830|P10599	8.00451e+06
P61160|P61158	7.94706e+06
Q14185|Q92556	7.93735e+06
P62249|P46782	7.93236e+06
P38398|P38398	7.92335e+06
Q13158|P25445	7.90908e+06
Q15848|Q15848	7.90802e+06
P38606|Q9UI12	7.90567e+06
Q14974|P62826	7.89951e+06
Q13627|Q13627	7.89899e+06
Q9HCE7|Q9HAU4	7.84491e+06
Q06187|P62993	7.78202e+06
Q9Y6D6|Q9Y6D5	7.75783e+06
Q06587|Q99496	7.67203e+06
P63010|Q00610	7.6706e+06
P27797|P14625	7.65213e+06
Q16777|P62805	7.65151e+06
P52803|P54764	7.59165e+06
P35998|P25786	7.58574e+06
P00751|P01024	7.5845e+06
P09038|P21802	7.57579e+06
Q99615|P07900	7.55027e+06
P15880|P23396	7.54903e+06
O15116|P62312	7.52715e+06
P62195|P28070	7.50112e+06
P62195|P20618	7.50112e+06
O00487|Q15008	7.50025e+06
P23229|P05556	7.47625e+06
P12004|Q9Y253	7.46479e+06
P62191|P20618	7.4353e+06
O00231|O00487	7.4353e+06
O15392|Q53HL2	7.4212e+06
P35998|P20618	7.34457e+06
Q15291|Q6UXN9	7.34042e+06
P49591|P26639	7.33199e+06
O43633|Q9Y3E7	7.31563e+06
O00232|P51665	7.31413e+06
Q9UBE0|P55854	7.29383e+06
P62195|O00487	7.29294e+06
Q9NYB9|Q92558	7.2908e+06
Q99717|Q13485	7.2598e+06
Q13547|Q96ST3	7.23974e+06
P62244|P08865	7.16734e+06
Q9Y5M8|P08240	7.12857e+06
P30260|Q9UM11	7.11354e+06
O94906|Q6P2Q9	7.09256e+06
Q92747|P59998	7.07592e+06
P00533|O75159	7.07135e+06
Q9UNE7|P61077	7.05936e+06
O15116|P62310	7.04437e+06
P62310|Q9UK45	7.04437e+06
O14802|Q9NW08	7.03995e+06
P28482|Q9HBH9	7.01406e+06
P20963|P43403	6.97698e+06
Q13200|P48556	6.96796e+06
O00487|Q13200	6.95133e+06
P25788|O00487	6.94926e+06
O75530|Q15910	6.94739e+06
P06493|Q99640	6.90523e+06
Q15768|P54764	6.88728e+06
P62191|Q99460	6.86868e+06
Q9BZD4|Q9HBM1	6.86657e+06
Q9UM13|Q9UJX2	6.86492e+06
Q05193|Q99961	6.8488e+06
P08708|P23396	6.84683e+06
Q86VP6|Q13618	6.84336e+06
O75367|P68431	6.81534e+06
Q9BYH8|P19838	6.79057e+06
P25789|O00232	6.78357e+06
P30279|Q00534	6.77354e+06
P03372|Q9Y6Q9	6.76563e+06
Q96PU5|P51668	6.76106e+06
P55036|P48556	6.75089e+06
P63010|P32121	6.7331e+06
Q15003|Q9NTJ3	6.69165e+06
O95433|P07900	6.67449e+06
P20226|Q00403	6.65883e+06
P15531|O00746	6.65648e+06
O00487|O43242	6.63914e+06
P38398|P51587	6.63866e+06
P19022|P35222	6.62437e+06
P18621|P61254	6.61672e+06
O75150|P49459	6.61628e+06
O15169|Q92997	6.59761e+06
P62333|P49721	6.59257e+06
P62191|Q9UNM6	6.59257e+06
Q05193|Q05193	6.57401e+06
P50991|Q92526	6.555e+06
O95486|P53992	6.54126e+06
P55854|P63279	6.5058e+06
Q92769|Q9P2R6	6.48e+06
P28482|P28482	6.46931e+06
P40306|P28065	6.44195e+06
P23443|P28482	6.4314e+06
P10276|P10276	6.42422e+06
Q92731|Q15466	6.41646e+06
P61313|P62424	6.40374e+06
Q96H20|Q86VN1	6.36718e+06
Q9H492|Q13501	6.36055e+06
P13861|P31323	6.35381e+06
P25789|P28074	6.3365e+06
P30279|P24941	6.32861e+06
P68431|P62805	6.30859e+06
Q9Y4K3|P61077	6.27422e+06
P52565|P61586	6.23979e+06
P05067|P29353	6.22e+06
P10275|P51843	6.13991e+06
Q99741|P33993	6.13365e+06
P04150|P07900	6.11706e+06
O15143|O15145	6.10748e+06
P32119|P10599	6.10582e+06
P62701|P46781	6.10483e+06
P25789|P51665	6.08233e+06
P62244|P62266	6.08002e+06
Q09472|Q9NQB0	6.07863e+06
P53621|O14579	6.06432e+06
Q15759|Q16539	6.04401e+06
P63167|Q96FJ2	6.04015e+06
Q13200|P55036	6.02e+06
Q9H211|Q14566	6.01514e+06
P78317|P62837	6.00947e+06
P78317|P61077	6.00947e+06
P21802|P62993	5.99899e+06
P60953|Q13153	5.95504e+06
P38398|O60934	5.94735e+06
P19388|P62875	5.91872e+06
P22681|P07948	5.87204e+06
O00327|Q16665	5.84211e+06
Q15797|Q15796	5.82176e+06
P50213|P51553	5.82172e+06
O94973|Q9Y6I3	5.80771e+06
Q96SB4|Q07955	5.7951e+06
P28715|P12004	5.78599e+06
Q13490|P51668	5.78513e+06
P11387|P11388	5.77899e+06
Q9Y6K1|Q9UJW3	5.77561e+06
Q92608|P15153	5.76832e+06
P55884|O15372	5.76703e+06
P56545|P56545	5.7654e+06
P24385|P38936	5.76209e+06
O95486|O94855	5.75216e+06
P19388|P61218	5.75099e+06
Q13480|P27986	5.6804e+06
P42224|P52630	5.66846e+06
O43809|Q16630	5.6537e+06
P08238|P53041	5.64704e+06
P06756|P05556	5.64048e+06
Q96J02|P68036	5.62401e+06
P46783|P23396	5.61354e+06
Q99962|O43426	5.6074e+06
P61158|O00401	5.60591e+06
P46109|P49023	5.59867e+06
Q86U86|P51532	5.57224e+06
P30466|P61769	5.52751e+06
P34932|P11142	5.48206e+06
Q15436|O94979	5.45887e+06
P27635|P18124	5.44077e+06
P27635|P62913	5.44077e+06
P06241|P09619	5.43138e+06
Q13200|Q15008	5.42602e+06
Q9NVP2|P62805	5.42592e+06
P51531|P51532	5.39374e+06
P61201|Q13616	5.39117e+06
P25787|O00232	5.3844e+06
Q92769|Q16576	5.36492e+06
O43617|Q8IUR0	5.36107e+06
Q13888|Q13889	5.36005e+06
P62993|P61978	5.3463e+06
P46531|Q9UM47	5.34296e+06
P35221|P18206	5.32812e+06
P48788|P45378	5.31599e+06
Q14152|P60228	5.26899e+06
O95376|P68036	5.24729e+06
P40189|P42702	5.24717e+06
P62993|P18031	5.24178e+06
Q8TAA3|P28074	5.23505e+06
P62191|P25786	5.22122e+06
P62888|P62424	5.21805e+06
Q9Y2Q5|Q9UHA4	5.20242e+06
O75821|Q13347	5.20184e+06
P11142|Q08752	5.19203e+06
P24941|Q16667	5.18858e+06
P07237|P30101	5.18855e+06
Q9UKV8|Q9H9G7	5.1824e+06
P04075|P06733	5.1689e+06
Q8IY18|Q96SB8	5.15337e+06
Q9Y333|O95777	5.14511e+06
P35998|O00232	5.13775e+06
P24863|Q9BWU1	5.13654e+06
P10515|O00330	5.10975e+06
Q13418|Q9HBI1	5.10787e+06
Q99436|O00231	5.06777e+06
Q13277|P61764	5.06496e+06
P61326|Q9Y5S9	5.0617e+06
O43488|O95154	5.05746e+06
P61160|O15145	5.048e+06
P07900|O94826	5.04741e+06
O14920|Q9Y6K9	5.04578e+06
Q9P0U3|P61956	5.04498e+06
Q15797|O43541	5.03629e+06
P02452|P02751	5.01495e+06
Q9GZV9|P11362	5.00236e+06
P36543|Q9UI12	4.98467e+06
Q13362|P30154	4.9846e+06
P62312|Q9UK45	4.95919e+06
Q9H8E8|Q92830	4.94791e+06
P06241|P16885	4.94476e+06
Q969P5|P63208	4.90642e+06
Q96BI3|P49768	4.89074e+06
Q92968|P50542	4.84862e+06
P60900|P28065	4.84296e+06
P25787|P40306	4.84296e+06
P49721|O00231	4.83713e+06
P62195|O43242	4.83713e+06
P62877|P63208	4.82562e+06
O14964|O75886	4.80769e+06
P30876|P62487	4.80357e+06
O00311|P49736	4.80208e+06
P38398|Q92547	4.80073e+06
P00338|P07195	4.77559e+06
P42575|P42575	4.76969e+06
P40855|P56589	4.76684e+06
P62805|O14929	4.76127e+06
Q96IJ6|Q9Y5P6	4.7535e+06
Q09472|P37231	4.73503e+06
P19838|Q01201	4.69492e+06
P24941|P06400	4.68487e+06
P62306|P62308	4.67714e+06
Q13616|Q969H0	4.6764e+06
Q09472|Q96EB6	4.66648e+06
P43686|P20618	4.65346e+06
Q9NPB6|Q8TEW0	4.65068e+06
P62841|P62269	4.6265e+06
P01100|P05412	4.61168e+06
Q13418|P48059	4.59673e+06
P35998|O43242	4.58145e+06
P62191|O43242	4.58145e+06
Q03405|P00749	4.55775e+06
Q92993|Q9Y4A5	4.55526e+06
P43681|P17787	4.55017e+06
P62875|P30876	4.54608e+06
Q92769|Q09028	4.52849e+06
P56945|P06241	4.51961e+06
P62310|Q9Y4Z0	4.51235e+06
P30154|P67775	4.51114e+06
P06493|P33552	4.51075e+06
O14818|P51665	4.50487e+06
P46087|Q8IY81	4.46677e+06
P62333|Q99460	4.46464e+06
P17980|Q15008	4.44315e+06
P60228|O00303	4.43501e+06
P35998|P60900	4.43204e+06
P49418|Q99962	4.43099e+06
P10515|Q15119	4.43081e+06
P61218|P19387	4.42641e+06
Q92769|O94776	4.42616e+06
O75150|P63146	4.4255e+06
P31946|P11021	4.39915e+06
Q9Y5K8|P36543	4.38794e+06
Q14152|Q13347	4.3745e+06
P60900|Q13200	4.36823e+06
Q13077|Q12933	4.35842e+06
P00533|Q06124	4.35638e+06
P61769|P29016	4.3548e+06
P83916|Q13185	4.34455e+06
P04234|P07766	4.33944e+06
P25788|P28065	4.30708e+06
P40692|P54277	4.30194e+06
P62263|P46782	4.28606e+06
P22607|P62993	4.26791e+06
P43686|Q99460	4.26562e+06
P15056|P04049	4.25539e+06
P63167|P63167	4.24451e+06
P18621|P18124	4.2407e+06
Q10567|Q9Y6Q5	4.23756e+06
Q07817|P04637	4.22256e+06
Q14596|Q13501	4.21189e+06
Q9UNM6|P48556	4.20791e+06
Q9HCJ2|Q9Y2I2	4.20097e+06
P31946|P30305	4.19988e+06
Q9BV36|P51159	4.18991e+06
P62993|Q92835	4.17632e+06
P26373|P61313	4.1743e+06
P17980|O00487	4.15517e+06
P62847|P62081	4.14973e+06
Q14974|O00410	4.14952e+06
O15371|P60228	4.1424e+06
O00232|P55036	4.1137e+06
P22681|P29353	4.11214e+06
Q96PU5|P61086	4.11103e+06
Q9BQE3|Q13509	4.10973e+06
P84022|Q9HCE7	4.10077e+06
P05067|O00213	4.09951e+06
P42574|Q14790	4.08019e+06
P31946|P15056	4.07735e+06
P06748|P46777	4.07631e+06
P24385|P49841	4.06623e+06
O14818|Q13200	4.05912e+06
Q04771|P08476	4.05532e+06
Q06787|P51114	3.99238e+06
P61201|Q9BT78	3.99091e+06
P62993|Q9UKW4	3.97826e+06
P51812|P27361	3.97203e+06
Q05655|O15530	3.95875e+06
Q9H3D4|O15350	3.95047e+06
P00519|P04637	3.93526e+06
P31946|Q04917	3.92771e+06
P35998|O00487	3.92319e+06
P55769|O00567	3.91804e+06
Q9NVA2|Q15019	3.88038e+06
Q13118|Q96ST3	3.87171e+06
Q07864|P09884	3.86424e+06
O43353|Q9Y4K3	3.85148e+06
P28347|P46937	3.83881e+06
P62191|Q99436	3.8293e+06
O00470|P40424	3.82735e+06
Q99436|P28065	3.80988e+06
Q13200|P54725	3.80964e+06
P98172|P54762	3.79012e+06
Q99594|P46937	3.78414e+06
O75947|P48047	3.75456e+06
P68104|P24534	3.75155e+06
P08514|P05106	3.74444e+06
Q8WWY3|O94906	3.74298e+06
Q9H211|O75496	3.74034e+06
P46778|P61254	3.73448e+06
P62333|P28066	3.73448e+06
P52292|O60684	3.73032e+06
P62195|P25786	3.71682e+06
P31943|P09651	3.71404e+06
O14818|Q15008	3.69523e+06
P49917|Q13426	3.69447e+06
P62750|P62424	3.69156e+06
Q9BYM8|Q96EP0	3.67578e+06
P01903|Q30154	3.67211e+06
Q92747|O15511	3.67124e+06
P62877|P62837	3.66795e+06
Q9UNM6|Q13200	3.66569e+06
P55036|P55072	3.65897e+06
P62851|P46782	3.64574e+06
P62249|P62847	3.64516e+06
P63220|P15880	3.63536e+06
Q9UJX4|Q9UJX2	3.63525e+06
Q13415|O43929	3.63013e+06
P62826|P55060	3.62537e+06
Q9UNE7|P61088	3.62293e+06
P62877|P61081	3.61185e+06
P10644|P31321	3.60531e+06
P62263|P62857	3.60359e+06
P02671|P02679	3.59579e+06
Q9Y6D9|Q13257	3.56274e+06
P00519|P42684	3.553e+06
P52435|P24928	3.55097e+06
Q16665|P84022	3.54843e+06
P30048|P30048	3.53709e+06
P00492|Q9NRG1	3.53334e+06
O15169|P49841	3.53307e+06
Q09472|P84022	3.53233e+06
Q13191|P62993	3.5285e+06
Q9UJX4|Q9UJX3	3.52271e+06
P31947|P63104	3.52122e+06
P46778|P32969	3.51578e+06
P10275|Q09472	3.49066e+06
P61019|P51149	3.482e+06
P25789|P28065	3.477e+06
Q9Y535|O75575	3.47619e+06
Q9GZQ8|Q13501	3.47314e+06
P56945|P46108	3.46372e+06
Q15653|Q04206	3.44651e+06
P04637|P78527	3.44565e+06
P00533|P62993	3.44541e+06
P78371|P50990	3.42416e+06
P62191|Q15008	3.415e+06
P25963|Q01201	3.4016e+06
Q15418|P27361	3.39686e+06
P27348|P15056	3.38137e+06
Q8WV28|P43405	3.37972e+06
O60674|P40763	3.37849e+06
P23443|O15530	3.36557e+06
Q15437|O95487	3.31868e+06
Q92769|O60264	3.31228e+06
Q15233|P23246	3.31074e+06
O00231|P55036	3.29955e+06
O00231|P51665	3.29955e+06
O75530|Q16576	3.29541e+06
P49721|O00487	3.29413e+06
Q99436|P51665	3.2885e+06
Q07817|Q07812	3.25399e+06
Q5RKV6|Q96B26	3.25265e+06
Q9P289|Q9P289	3.25222e+06
Q13451|P07900	3.24189e+06
P62873|P63092	3.23838e+06
Q13501|Q13501	3.22688e+06
P54727|Q9UMX0	3.22037e+06
Q13547|Q9UKV0	3.21579e+06
Q9UPY3|Q15633	3.20744e+06
P78552|P24394	3.19348e+06
Q16531|Q09028	3.18963e+06
Q53EZ4|Q8WUM4	3.1841e+06
Q15561|P46937	3.18265e+06
P62244|P62701	3.18177e+06
Q8IZP0|O43639	3.18136e+06
Q9UPT6|P45983	3.17918e+06
P60228|O15372	3.17778e+06
O00410|P62826	3.17402e+06
O15145|P47755	3.16162e+06
P61218|P62487	3.16134e+06
P54274|Q15554	3.16036e+06
O00401|O43516	3.15613e+06
P10415|P55957	3.15189e+06
P56945|P07948	3.12928e+06
Q9BYM8|P68036	3.11805e+06
O14818|Q9UNM6	3.11534e+06
P17980|Q9UNM6	3.11534e+06
P50750|P24928	3.11067e+06
P28331|P19404	3.10731e+06
O43242|Q15008	3.09519e+06
P63096|P49798	3.08923e+06
Q12967|P01112	3.0866e+06
P52434|P62487	3.08534e+06
P02489|P02511	3.08348e+06
Q9Y333|Q9UK45	3.07991e+06
Q03135|P51636	3.07747e+06
Q07020|P46777	3.07579e+06
P62424|P62917	3.07579e+06
P12755|P84022	3.07272e+06
Q06547|Q06546	3.06972e+06
P09769|P43405	3.06899e+06
Q05655|P07948	3.06793e+06
O75909|P24941	3.06639e+06
P04049|P04049	3.04277e+06
Q15436|O95486	3.04131e+06
P05067|P04156	3.03179e+06
Q9Y3U8|P46777	3.01255e+06
Q8WU20|P62993	3.01143e+06
P27361|P04049	3.00521e+06
P49792|P63165	2.99991e+06
O15144|O15145	2.99964e+06
P15311|P26038	2.99745e+06
Q01094|P06400	2.99656e+06
Q9Y285|Q9NSD9	2.99103e+06
O96017|O96017	2.95844e+06
O15169|O14641	2.95538e+06
Q9UJX4|P30260	2.94756e+06
P49721|Q9UNM6	2.93306e+06
P62333|O00231	2.93306e+06
P25789|Q15008	2.93306e+06
O43318|P36897	2.9309e+06
Q9BQE3|Q9BUF5	2.922e+06
P68366|Q13885	2.922e+06
P17948|P35968	2.92102e+06
P08620|P22607	2.90949e+06
P16333|O00401	2.907e+06
Q09472|Q13547	2.90525e+06
Q9UK97|P63208	2.90479e+06
Q9UPY3|O75569	2.89353e+06
Q13451|P08238	2.8668e+06
P12757|P84022	2.85752e+06
P61077|P0CG48	2.85056e+06
Q9Y478|O43741	2.84392e+06
Q13705|O95390	2.84051e+06
O94906|P62316	2.83781e+06
P12644|O00238	2.82672e+06
P35568|P27986	2.82265e+06
Q99623|P35232	2.81851e+06
P10600|P37173	2.81357e+06
P62826|O14980	2.80573e+06
P06239|Q86WV1	2.79564e+06
O14818|P28065	2.79388e+06
Q9P289|O00506	2.78055e+06
P51452|P28482	2.77738e+06
P62263|P23396	2.76091e+06
P11474|P03372	2.75787e+06
Q13547|P28749	2.75208e+06
O43157|Q92854	2.75031e+06
P52657|P62380	2.7501e+06
P45983|P45984	2.74749e+06
O94817|Q9NT62	2.74522e+06
P04626|P12931	2.74072e+06
O00232|O00487	2.73474e+06
Q9UQ84|P12004	2.72055e+06
P62993|P35568	2.71725e+06
P25787|O00231	2.70414e+06
P49458|P37108	2.69129e+06
Q8WU20|Q06124	2.68801e+06
P60228|O75821	2.68652e+06
P02794|P02794	2.68595e+06
Q13547|O60264	2.68505e+06
P61586|P15498	2.68253e+06
Q07020|P18124	2.67893e+06
Q8TAQ2|Q96GM5	2.67789e+06
P28066|Q15008	2.6742e+06
P62873|P63244	2.67022e+06
Q13489|P98170	2.66389e+06
P25789|Q13200	2.66324e+06
Q15120|Q15118	2.66062e+06
P09651|P23246	2.65615e+06
P25786|P28065	2.6516e+06
P04637|P08047	2.64898e+06
P63104|P23528	2.63828e+06
P62195|Q9UNM6	2.61899e+06
P35998|Q9UNM6	2.61899e+06
P22087|Q9Y2X3	2.61863e+06
P22681|Q96B97	2.61625e+06
O15111|O43318	2.61072e+06
Q8TBC4|Q13564	2.60879e+06
Q9BYG5|Q8TEW0	2.59653e+06
P49418|O94973	2.59282e+06
P78352|Q12879	2.58264e+06
P25787|P28065	2.57584e+06
O14618|P00441	2.5725e+06
P63104|P41743	2.56898e+06
P43686|P25786	2.56345e+06
Q99460|O43242	2.55291e+06
Q01860|P48431	2.55161e+06
P45973|Q13263	2.54995e+06
P19388|P52435	2.53995e+06
Q12834|Q9UM11	2.53502e+06
P25787|O00487	2.52113e+06
Q92542|P49768	2.52042e+06
Q16777|Q96A08	2.51806e+06
Q8WW43|P49768	2.51098e+06
O14818|O00487	2.51049e+06
P63104|Q9Y4H2	2.50916e+06
Q9Y678|P61923	2.50114e+06
Q00610|O14964	2.5005e+06
P62942|P36897	2.50029e+06
Q16644|Q15759	2.49592e+06
Q9UM47|Q06330	2.49e+06
Q92747|O15145	2.48759e+06
Q9UGJ0|Q13131	2.47205e+06
P62993|P43405	2.472e+06
P50914|Q02878	2.46486e+06
Q9H4D5|Q9NPJ8	2.46427e+06
Q9NT62|O95352	2.45204e+06
P52435|P30876	2.44545e+06
P63104|Q8TEW0	2.44316e+06
P20618|O00231	2.44065e+06
P25787|P51665	2.44065e+06
P20618|P51665	2.44065e+06
P25788|P51665	2.44065e+06
O43318|Q9Y4K3	2.43723e+06
P04637|P61088	2.43476e+06
P31930|P14927	2.42441e+06
Q15019|Q16181	2.4236e+06
P17980|O00233	2.42139e+06
P21281|Q9UI12	2.42068e+06
Q07864|P56282	2.4149e+06
Q07960|P61586	2.41034e+06
P61201|Q92905	2.40138e+06
P51843|Q13285	2.39731e+06
Q13873|P36897	2.39357e+06
Q93034|P62877	2.3911e+06
P62333|Q13200	2.38559e+06
Q9HAU4|P51668	2.38409e+06
P31946|P49815	2.37366e+06
P61218|P52434	2.35883e+06
Q13409|P63167	2.35206e+06
P24385|P06493	2.34889e+06
P16118|P16118	2.341e+06
Q9HCE7|P61077	2.34025e+06
Q16695|P62805	2.33787e+06
P62195|Q8TAA3	2.33559e+06
P31749|P49815	2.33484e+06
Q6P2Q9|O75643	2.33278e+06
P62158|P06213	2.32506e+06
P14868|P07814	2.31739e+06
P28482|P36507	2.31722e+06
P62158|Q14012	2.31294e+06
Q15562|P46937	2.30583e+06
P35221|P14923	2.3044e+06
Q16665|P63165	2.30356e+06
Q13616|Q13309	2.29185e+06
P60709|P07737	2.2888e+06
Q13490|P98170	2.28415e+06
O60256|P60891	2.28278e+06
O60256|P11908	2.28166e+06
Q8TAA3|P49720	2.28122e+06
P19525|P42224	2.2746e+06
O14974|P62140	2.27097e+06
P29459|P29460	2.26878e+06
P07814|P56192	2.26806e+06
P10275|Q15596	2.25777e+06
P53618|Q9UBF2	2.25692e+06
P29274|P14416	2.25029e+06
Q9UBE0|P63165	2.24901e+06
Q14152|Q99613	2.24855e+06
P36543|O75348	2.24645e+06
P51149|P24386	2.24509e+06
O75928|P61956	2.24182e+06
O94941|P68036	2.23216e+06
P08603|P01024	2.22569e+06
Q14152|Q7L2H7	2.22168e+06
O94906|P62314	2.22096e+06
Q92731|Q9Y6Q9	2.21921e+06
P49841|Q96BR1	2.21378e+06
P62750|P46777	2.213e+06
P46777|P62424	2.213e+06
P00533|Q14289	2.21032e+06
P24941|Q00526	2.20247e+06
P27635|P46777	2.20067e+06
P00519|P00533	2.1967e+06
P42684|P00533	2.1967e+06
P51149|P62491	2.19452e+06
Q13619|Q9UBF6	2.19252e+06
P61353|P62701	2.19145e+06
P62280|P23396	2.19145e+06
P22234|P22234	2.19087e+06
P25789|O00487	2.18384e+06
P63104|P31749	2.18329e+06
P24928|P36954	2.16898e+06
P35222|P14923	2.16833e+06
P08648|P05106	2.16512e+06
P50914|P32969	2.16328e+06
O14497|P51532	2.15962e+06
P84022|O00308	2.15881e+06
P61769|Q03518	2.15827e+06
P40692|P52701	2.158e+06
P31749|P60484	2.14815e+06
Q92879|Q15717	2.14658e+06
P27037|P18075	2.14314e+06
Q9Y3B2|Q06265	2.1421e+06
P62841|P62249	2.14155e+06
P31749|P32121	2.14004e+06
Q14137|O00541	2.13921e+06
P08559|P11177	2.13839e+06
Q9NS91|P49459	2.13539e+06
Q15466|P10276	2.13364e+06
P63146|Q8IWV8	2.12855e+06
Q13885|P68371	2.12831e+06
P50613|P24928	2.12553e+06
Q05193|Q99962	2.11925e+06
Q09472|P11473	2.11827e+06
P04629|Q13501	2.11721e+06
Q9BQE3|P07437	2.11e+06
P46108|P49023	2.1072e+06
P35222|Q09472	2.10324e+06
P46934|Q9BT67	2.09807e+06
P01374|Q06643	2.09785e+06
P40692|P43246	2.09635e+06
P17858|P17858	2.09265e+06
Q9UBC3|Q9UJW3	2.09074e+06
P69905|P02100	2.08813e+06
P61326|Q15287	2.08506e+06
O43502|Q06609	2.07928e+06
P21860|P62993	2.0778e+06
P54105|P62314	2.07324e+06
P49721|P55036	2.07109e+06
P06241|O60880	2.07019e+06
P84022|Q9HAU4	2.06978e+06
P43686|Q99436	2.0645e+06
Q09161|Q86V81	2.05828e+06
P35579|Q12965	2.05819e+06
Q15172|P67775	2.049e+06
P61160|O15511	2.03874e+06
P00533|P17252	2.03286e+06
P54105|P62304	2.03004e+06
P49721|Q13200	2.02834e+06
Q96BI3|Q92542	2.02431e+06
P38398|Q14676	2.01808e+06
Q13098|P61201	2.01675e+06
P62487|P36954	2.01647e+06
O15145|P59998	2.0145e+06
Q15436|P55735	2.01332e+06
Q7L5N1|Q7L5N1	2.00547e+06
P60953|P52565	2.00393e+06
P63104|P60709	2.00141e+06
Q02543|P62701	1.99214e+06
P17980|P51665	1.9919e+06
O15143|P61160	1.98271e+06
O15379|P56524	1.97636e+06
P24941|Q13309	1.97393e+06
P25788|Q9UNM6	1.96319e+06
Q5RKV6|Q06265	1.96028e+06
P49721|P51665	1.96009e+06
P28070|P51665	1.96009e+06
P53621|P48444	1.96006e+06
Q9GZV9|P21802	1.95994e+06
P10767|P21802	1.95994e+06
P55075|P21802	1.95994e+06
P24928|O00267	1.95562e+06
P25786|O00487	1.95e+06
P61313|P18621	1.94632e+06
P62263|P62847	1.94327e+06
P28070|O00231	1.93724e+06
P63104|P49815	1.93425e+06
P50395|P62820	1.93421e+06
Q00534|P42773	1.9316e+06
O75530|Q13547	1.92415e+06
P12004|P27694	1.9238e+06
Q99816|Q9UK41	1.92298e+06
P49841|P04637	1.92184e+06
Q15013|Q13257	1.91441e+06
P62993|Q14247	1.91439e+06
P63104|P33176	1.91077e+06
P29353|P12931	1.90944e+06
Q15349|P27361	1.9089e+06
Q92598|P54652	1.90674e+06
P24394|P42226	1.90356e+06
P21281|Q16864	1.90127e+06
P61604|P10809	1.89089e+06
Q9Y6N7|O94813	1.88562e+06
O15111|O14920	1.88276e+06
P00533|P07947	1.87973e+06
Q09472|P28482	1.87863e+06
P61160|P59998	1.87561e+06
O75146|O00291	1.87506e+06
P62495|Q8IYD1	1.86945e+06
Q9UM13|P30260	1.8681e+06
O00629|Q14974	1.86387e+06
O60216|Q14683	1.86097e+06
Q14999|Q8IWT3	1.85604e+06
P52434|P19387	1.85169e+06
P35998|P54727	1.84992e+06
Q16611|Q07812	1.84329e+06
Q9Y4Z0|P62312	1.83789e+06
Q13158|Q13546	1.83489e+06
P51946|P24941	1.82423e+06
P62829|P46777	1.82332e+06
Q8TAM1|Q9NPJ1	1.81504e+06
Q9UNE7|P34932	1.81447e+06
P35222|P11362	1.8113e+06
Q9Y5A7|O15205	1.80907e+06
P62258|Q92574	1.80828e+06
Q05513|O15530	1.79948e+06
P50613|P50750	1.79511e+06
O60832|P22087	1.79359e+06
P63261|P23528	1.78667e+06
Q13889|Q92759	1.78303e+06
P15313|Q9Y5K8	1.78224e+06
Q99683|O95382	1.76924e+06
P02741|P02743	1.76536e+06
P41235|Q96EB6	1.76306e+06
P49023|P12931	1.76283e+06
P25054|O15169	1.75711e+06
P27348|P56524	1.7549e+06
P14317|P43405	1.7543e+06
O60671|Q99638	1.75337e+06
P29353|O15357	1.7518e+06
P00533|Q15303	1.74853e+06
Q9UMS4|O75643	1.74693e+06
Q96GD4|Q9NQS7	1.74547e+06
Q04721|Q06330	1.74339e+06
P24385|P06400	1.74312e+06
P63104|P04637	1.74049e+06
Q02218|P08559	1.7372e+06
P20226|Q92994	1.73609e+06
Q5S007|Q5S007	1.73541e+06
Q9UQ16|P62993	1.73508e+06
Q96FX7|Q9UJA5	1.73408e+06
P28749|Q08999	1.72952e+06
P30281|P46527	1.72749e+06
O14818|O00232	1.72569e+06
P31943|P52597	1.72389e+06
Q16514|P49848	1.72149e+06
Q13191|P06241	1.71589e+06
Q9UKV8|Q9UPY3	1.71508e+06
Q9BUI4|Q9H1D9	1.71508e+06
P50914|Q02543	1.7096e+06
Q05397|P49023	1.70914e+06
P46109|Q07889	1.70733e+06
P35998|Q99436	1.70615e+06
P52434|P36954	1.70555e+06
Q92934|P10415	1.70546e+06
P37231|Q9UBK2	1.70428e+06
O95750|P22455	1.70296e+06
P24928|P19387	1.70043e+06
Q8IZP0|P16333	1.69185e+06
P43405|P15498	1.69071e+06
Q09028|O60264	1.69012e+06
Q07817|Q9BXH1	1.68561e+06
P28340|P49005	1.68258e+06
Q9UKA1|P63208	1.68053e+06
Q9Y243|O15530	1.67029e+06
P27635|P46778	1.663e+06
Q9Y4H2|P27986	1.66118e+06
P32121|P27361	1.65714e+06
P16234|P09619	1.65651e+06
P62266|P62753	1.65488e+06
O15520|P21802	1.64348e+06
Q9NS91|P63146	1.63391e+06
O75478|O75528	1.63331e+06
P31946|Q5S007	1.63266e+06
Q15542|P20226	1.63248e+06
P62829|P83731	1.62598e+06
Q8TAA3|P28072	1.62213e+06
P84022|P36897	1.6171e+06
P62857|P62753	1.61054e+06
Q14289|P49023	1.60496e+06
Q08043|O43707	1.60162e+06
P30154|P63151	1.59711e+06
P55769|Q9Y2X3	1.59583e+06
P36896|P27037	1.59545e+06
Q9UMS4|P62314	1.59429e+06
P63104|P35222	1.58966e+06
O00232|Q99460	1.58907e+06
P62195|P51665	1.58907e+06
P61313|P84098	1.58476e+06
P27348|Q5S007	1.58314e+06
O00327|Q99743	1.57607e+06
P55075|P22607	1.57207e+06
Q13547|Q08999	1.5712e+06
Q9UNE7|P51668	1.56767e+06
P31749|P41240	1.56702e+06
O95433|P08238	1.56412e+06
Q9Y5S9|Q15287	1.55966e+06
P00533|Q07954	1.5574e+06
P42575|P42574	1.55724e+06
P37023|P36897	1.55417e+06
P63000|P63000	1.55235e+06
P50991|P50990	1.55113e+06
Q9BU89|P63241	1.54513e+06
Q15172|P30154	1.54494e+06
Q13485|O15105	1.54433e+06
P35998|P28074	1.54392e+06
O95835|Q9NRM7	1.54137e+06
Q8NFJ9|Q9BXC9	1.54124e+06
Q05513|Q9BYG5	1.54116e+06
Q9UKV5|P55072	1.54099e+06
P25786|O00232	1.5409e+06
P32121|P28482	1.5366e+06
Q99962|Q99963	1.53011e+06
P46531|P49757	1.52929e+06
O00499|O00499	1.52767e+06
Q9UNE7|P51965	1.52645e+06
P62249|P62081	1.52468e+06
P12931|P12931	1.52179e+06
P02008|P68871	1.52041e+06
P30443|P01732	1.52041e+06
P04439|P01732	1.52041e+06
P27797|O95166	1.51847e+06
P49841|P05771	1.51833e+06
Q9BPX5|O15145	1.51725e+06
O94776|Q09028	1.51554e+06
P15880|P08865	1.51279e+06
P22087|Q8TED0	1.50508e+06
P20749|Q01201	1.50052e+06
O43734|Q9Y4K3	1.49647e+06
O14497|Q8NFD5	1.49153e+06
P31371|P21802	1.49057e+06
P05067|Q9UQF2	1.48775e+06
P07992|Q92889	1.48515e+06
P46531|P49768	1.48515e+06
P62195|P55036	1.48328e+06
P83731|P62424	1.48274e+06
P05067|P49768	1.48155e+06
O43521|P10415	1.48108e+06
O14757|P68400	1.47974e+06
Q05397|P16333	1.47475e+06
Q00005|P67775	1.47472e+06
P62993|P18433	1.47464e+06
P62263|P15880	1.46355e+06
O00567|Q9Y2X3	1.4633e+06
P61218|P24928	1.46301e+06
P25786|P40306	1.46144e+06
P19388|P30876	1.46088e+06
Q14181|P09884	1.45922e+06
O15116|Q9Y4Z0	1.45881e+06
Q96J02|Q9Y3C5	1.44914e+06
P09874|P09874	1.44819e+06
P28070|O00487	1.4476e+06
Q9Y6Q6|Q12933	1.44185e+06
P00533|P51692	1.43818e+06
P31749|Q9UNE7	1.43333e+06
Q71U36|Q9BUF5	1.42383e+06
P17655|P04632	1.42192e+06
Q9HAU4|P61077	1.42033e+06
Q9H4P4|P61077	1.41985e+06
O75530|Q15022	1.41894e+06
P62877|P61077	1.41363e+06
Q9P2I0|P51003	1.40741e+06
P33176|Q9H0B6	1.39701e+06
Q9Y4E8|Q13107	1.39664e+06
P49720|O00487	1.39632e+06
P36507|P04049	1.39496e+06
P28482|Q16539	1.39453e+06
Q9NPF5|Q9Y4A5	1.39195e+06
O15400|Q96AJ9	1.38746e+06
P03372|Q05086	1.38744e+06
P06493|P30291	1.38656e+06
P53992|O94855	1.38354e+06
P62993|P48023	1.38062e+06
Q7L576|P63000	1.37265e+06
Q14558|P11908	1.37051e+06
P18031|P12931	1.36862e+06
O15144|O15511	1.36742e+06
P28066|O00487	1.36678e+06
P51532|Q8TAQ2	1.36289e+06
P22681|Q9Y5K6	1.36284e+06
O94973|O00499	1.36253e+06
P14635|Q9UM11	1.3593e+06
Q15596|P19793	1.35826e+06
P30793|P30793	1.35792e+06
P14635|P38936	1.35759e+06
O75436|Q96QK1	1.35232e+06
P21860|Q15303	1.34999e+06
P83731|P62753	1.3459e+06
Q99942|Q9Y2X8	1.34146e+06
P54252|P54727	1.33818e+06
P25705|P21281	1.33781e+06
P61313|P18124	1.33606e+06
P62333|P25786	1.33606e+06
P17980|P28074	1.32701e+06
P18124|P62701	1.32549e+06
Q92769|P51532	1.32539e+06
P26641|P26640	1.32527e+06
Q99814|P40337	1.32324e+06
P19878|P63000	1.32285e+06
P28070|Q15008	1.32145e+06
O00555|O00305	1.32043e+06
Q9UHV9|Q99471	1.31963e+06
Q9H2X6|P04637	1.31651e+06
P62244|P23396	1.31372e+06
P45983|P45985	1.3131e+06
Q30201|P02786	1.31304e+06
Q15349|P28482	1.30923e+06
Q13131|P54646	1.3075e+06
Q92569|P42336	1.30721e+06
Q9UBU8|Q15014	1.30661e+06
Q09472|Q03181	1.30188e+06
Q16539|Q16539	1.30013e+06
Q66LE6|P67775	1.30006e+06
P19838|Q00653	1.29935e+06
P31749|P55072	1.29849e+06
P29692|P26641	1.2974e+06
P09132|P61011	1.29736e+06
Q8TBC4|P61081	1.29708e+06
P49841|P84022	1.29551e+06
P05230|P11362	1.29544e+06
Q99741|Q13415	1.28984e+06
Q9Y6Q9|P10276	1.2894e+06
Q14558|P60891	1.2812e+06
[truncated: 28,040 more rows]
